# Supplementary material for: A phylogeny-based directed evolution approach to boost the synthetic applications of glycosyltransferases
Source: Royal Society of Chemistry journal article supplement (doi:10.1039/d3gc01259j), 2023-01-01
Supplement: d3gc01259j1.pdf [file d3gc01259j1.pdf]

## **A Phylogeny-based Directed Evolution Approach to Boost the Synthetic Applications of Glycosyltransferases**

Peng Zhang<sup>1</sup>, Yu Ji<sup>1,\*</sup>, Shuaiqi Meng<sup>1</sup>, Zhongyu Li<sup>1</sup>, Dennis Hirtz<sup>3</sup>, Lothar Elling<sup>3</sup>, Ulrich Schwaneberg<sup>1,2,\*</sup>

1. Institute of Biotechnology, RWTH Aachen University, Worringerweg 3, 52074 Aachen, Germany

2. DWI-Leibniz Institute for Interactive Materials, Forckenbeckstraße 50, 52074 Aachen, Germany

3. Laboratory for Biomaterials, Institute of Biotechnology and Helmholtz-Institute for Biomedical Engineering, RWTH Aachen University, Pauwelsstraße. 20, 52074 Aachen, Germany

\*Corresponding Authors: Ulrich Schwaneberg, [u.schwaneberg@biotec.rwth-aachen.de](mailto:u.schwaneberg@biotec.rwth-aachen.de); Yu Ji, [yu.ji@biotec.rwth-aachen.de](mailto:yu.ji@biotec.rwth-aachen.de)

## Table of Contents

|                                                                                                                                           |    |
|-------------------------------------------------------------------------------------------------------------------------------------------|----|
| 1. Experimental section                                                                                                                   | 4  |
| 1.1. Retrieve GT1 family <i>Bacillus</i> glycosyltransferases from CAZy database                                                          | 4  |
| 1.2. Phylogenetic analysis                                                                                                                | 4  |
| 1.3. Chemicals and reagents                                                                                                               | 4  |
| 1.4. Bacterial strains, plasmids and media                                                                                                | 4  |
| 1.5. Casting <i>error-prone</i> PCR and site-saturated mutant libraries                                                                   | 5  |
| 1.6. Cultivation of libraries in 96-well microtiter plates                                                                                | 5  |
| 1.7. UDPG-recycling HTS system for GT variants screening                                                                                  | 6  |
| 1.8. Protein expression and purification                                                                                                  | 6  |
| 1.9. <i>In vitro</i> glycosylation reactions                                                                                              | 7  |
| 1.10. HPLC-PDA, MS and NMR assays                                                                                                         | 7  |
| 1.11. Identification of kinetic parameters                                                                                                | 8  |
| 1.12. Computational analysis                                                                                                              | 8  |
| 2. <sup>1</sup> H and <sup>13</sup> C NMR spectral data for glycosylated products <b>1a-9a</b>                                            | 9  |
| 3. Additional Tables and Figures                                                                                                          | 12 |
| Table S1. Genbank numbers of GTs in the nBGT branches (nBGT-1, -2, and -3 branch)                                                         | 12 |
| Table S2. GT sequence identity of BarGT-1, -2 and -3 in the nBGT branches with the typical GTs (YjiC, YojK and YdhE) in the main branches | 14 |
| Table S3. The specific activities (U/mg) of BarGT-3 (WT), I63P and I63P/H108G towards 9 substrates                                        | 15 |
| Table S4. The primers for casting <i>error-prone</i> PCR and SSM libraries                                                                | 16 |
| Table S5. HPLC methods and physical parameters for glycosylated products <b>1a-9a</b> .                                                   | 17 |
| Figure S1. The proportion (%) of each branch in <i>Bacillus</i> GT1 family enzymes.                                                       | 18 |
| Figure S2. SDS-PAGE detection of the expression of BarGT-1, -2 and -3                                                                     | 19 |
| Figure S3. HPLC and positive ion mass spectrometry (MS) analysis for the products <b>1a</b> and <b>2a</b>                                 | 20 |
| Figure S4. HPLC and positive ion mass spectrometry (MS) analysis for the products <b>3a</b> and <b>4a</b> .                               | 21 |
| Figure S5. HPLC and positive ion mass spectrometry (MS) analysis for the products <b>5a</b> and <b>6a</b>                                 | 22 |
| Figure S6. HPLC and positive ion mass spectrometry (MS) analysis for the products <b>7a</b> and <b>8a</b>                                 | 23 |
| Figure S7. HPLC and positive ion mass spectrometry (MS) analysis for the product <b>9a</b>                                                | 24 |
| Figure S8. The verification of the catalytic reversibility of BarGT-3                                                                     | 25 |
| Figure S9. Optimization of coefficient of variation (CV) in the UDPG-recycling high-throughput system                                     | 26 |
| Figure S10. Six most promising variants screening from the cepPCR library                                                                 | 27 |
| Figure S11. Top five active variants of site-saturation mutagenesis (SSM) libraries of I63 and H108                                       | 28 |
| Figure S12. SDS-PAGE detection of the expression of variants I63P, H108G and                                                              |    |

|                                                                                                           |           |
|-----------------------------------------------------------------------------------------------------------|-----------|
| I63P/H108G.....                                                                                           | 29        |
| Figure S13. Kinetic parameters and fitting curves analysis of BarGT-3 (WT) and its variants.....          | 30        |
| Figure S14. The positions of two identified residues I63 and H108 in the structural model of BarGT-3..... | 31        |
| Figure S15. The Ramachandran plot assessment.....                                                         | 32        |
| Figure S16. Multiple sequence alignment (MSA) analysis for BarGT-3.....                                   | 33        |
| Figure S17. The comparison of RMSF values of WT and the double-variant I63P/H108G.....                    | 34        |
| 4. Figures S18-S44. NMR spectrum of glycosylated products 1a-9a.....                                      | 35        |
| 5. The DNA and protein sequences of BarGT-1, -2, and -3.....                                              | 49        |
| <b>6. References.....</b>                                                                                 | <b>52</b> |

## **1. Experimental section**

### **1.1. Retrieve GT1 family *Bacillus* glycosyltransferases from CAZy database**

The information of GT1 family *Bacillus* glycosyltransferases (GTs) was retrieved from the release (until June 2021) of CAZy database (<http://www.cazy.org/>). After removing redundant sequences, a total of 1931 *Bacillus* GT sequences were further downloaded from the NCBI (GenBank) database using the Batch Entrez (<https://www.ncbi.nlm.nih.gov/sites/batchentrez>) according to the CAZy-supplied accession number.

### **1.2. Phylogenetic analysis**

The selected 1931 GT sequences were conducted multiple sequence alignments using MAFFT (<https://mafft.cbrc.jp/alignment/server/>).<sup>1, 2</sup> FastTree and Jukes-Cantor evolution model were used to construct maximum-likelihood phylogenetic trees.<sup>3</sup> To infer a tree for a protein alignment with the JTT+CAT model and to quickly estimate the reliability of each clade in the tree with the Shimodaira–Hasegawa test.<sup>4</sup> The resulting phylogenetic trees were visualized by iTOL.<sup>5</sup>

### **1.3. Chemicals and reagents**

All chemicals were of analytical grade and purchased from Sigma-Aldrich (Steinheim, Germany), AppliChem (Darmstadt, Germany), ABCR (Karlsruhe, Germany), TCI (Eschborn, Germany), and VWR International (Darmstadt, Germany).

### **1.4. Bacterial strains, plasmids and media**

(Electro)competent *E. coli* BL21 (DE3) (Agilent Technologies, Santa Clara, CA) was prepared for the protein expression. The genes encoding BarGT-1 (QEL68904), BarGT-2 (QEL69054) and BarGT-3 (QEL68377) with pET-28a (+) vector were retrieved from the CAZy database and synthesized in GenScript (GenScript Biotech, Rijswijk, Netherlands). LB media: 10 g/L tryptone, 5 g/L yeast extract and 10 g/L NaCl; TB media: 800 mL solution A (12 g/L tryptone, 24 g/L yeast extract and 4 g/L glycerol) mixed with 200 mL solution B (2.31 g KH<sub>2</sub>PO<sub>4</sub> and 12.54 g K<sub>2</sub>HPO<sub>4</sub>); SOC media: 20 g/L tryptone, 5 g/L yeast extract, 10 mM NaCl, 2.5 mM KCl, 10 mM MgCl<sub>2</sub>, 10 mM MgSO<sub>4</sub> and 20 mM glucose

(Carl Roth GmbH, Karlsruhe, Germany).

### **1.5. Casting *error-prone* PCR and site-saturated mutant libraries**

The BarGT-3 contains two domains (N- and C- domain), accordingly, the gene *pET28a-BarGT-3* was also divided into two fragments (fragment1: 604 bp and fragment2: 605 bp, **Table S4**). Cloning of the two fragments was further amplified by Megawhop.<sup>6</sup> The details for constructing casting *error-prone* PCR (cepPCR) mutant libraries were described in previous protocols.<sup>7</sup> For site-saturated mutagenesis (SSM), the SSM libraries of BarGT-3 were generated by one-step PCR (primers in **Table S4**). PCR mixture contained: VeriFi™ polymerase and mixes (50 µL, PCR Biosystems Ltd., London, UK), template (0.5 µL, 10 ng), forward and reverse primers (500 nM, 2 µL each), and ddH<sub>2</sub>O (up to 100 µL). The PCR condition was 95°C for 1 min, 95°C for 15 s/60°C for 15 s/72°C for 3.5 min (30 cycles), 72°C for 5 min. The amplified PCR products were digested by DpnI restriction endonuclease (2 µL, 10 U/µL) for additional 2 h to remove the template. The digested PCR products were purified by the Nucleospin Extract II kit (Macherey-Nagel, Dueren, Germany) and then transformed into the electrocompetent cells *E. coli* BL21(DE3) (1900 V). A total of 2160 colonies were picked in 96-well microtiter plate for the cepPCR mutant libraries (1080 colonies for N- and C- domain, respectively) and 180 colonies were for each single-site saturation mutagenesis library.

### **1.6. Cultivation of libraries in 96-well microtiter plates**

Colonies of cepPCR and SSM mutant libraries were transferred from LB agar plates into 96-well microtiter plates (MTPs, PS-F-bottom, Greiner Bio-One, Frickenhausen, Germany) containing 150 µL/well LB media supplemented with kanamycin (40 µg/mL). After cultivation (37°C, 900 rpm, 70% humidity, 24 h) in a MTP shaker (Multitron II, Infors GmbH, Einsbach, Germany). The libraries were further transferred to the fresh 96-well MTPs (150 µL/well LB media, kanamycin 40 µg/mL) using MTP replicators for another cultivation (37°C, 900 rpm, 70% humidity, 24 h). Then, 50 µL glycerol (60%, w/w) was added and the MTPs were stored at -80°C. For expression, 5 µL of MTP seedings were transferred into MTPs (PS-V-bottom, Greiner Bio-One, Frickenhausen, Germany) with TB media (145 µL, kanamycin 40 µg/mL). After cultivation for 2 h (37°C, 900 rpm, 70% humidity), IPTG was added for protein expression with a final concentration of 0.1 mM (16°C, 900 rpm, 70% humidity, 18 h). Cells were

harvested by using a centrifuge (4°C, 4000 rpm, 30 min, 5810R Eppendorf, Hamburg, Germany) and stored at -20°C for 2 h. Cell pellets were thawed and resuspended in 150 µL lysozyme solution (5 mg/mL in Tris-HCl buffer 50 mM, pH 7.5) and incubated in a MTP shaker (37°C, 900 rpm, 70% humidity, 2 h). After centrifugation (4°C, 4000 rpm, 30 min), the clarified cell lysates were used for screening assay.

### 1.7. UDPG-recycling HTS system for GT variants screening

The reverse reactions from 4NPG to UDP or UDPG catalyzed by BarGT-3 (WT) were performed in a final volume of 100 µL Tris-HCl buffer (50 mM, pH 7.5, 10 mM MgCl<sub>2</sub>) with 500 µM of 4-nitrophenyl-β-D-glucoside (4NPG), 100 µM of UDP or UDPG. For the UDPG-recycling HTS system, each MTP well reaction was performed in a final volume of 200 µL Tris-HCl buffer (50 mM, pH 7.5, 10 mM MgCl<sub>2</sub>) with variants (or wild type (WT), empty vector (EV), 20 µL), 500 µM of 4-nitrophenyl-β-D-glucoside (4NPG), 100 µM of UDPG and 500 µM of substrate **1** (dissolved in DMSO). The reaction mixtures were incubated in a microtiter plate reader (TECAN Sunrise, Männerdorf, Switzerland) at 37°C, and the absorbance measurements were recorded every 10 min at 405 nm for 2 h, with the plate shaken within the reader for 10 s before collection of each time point. Improvement (ΔAbs, fold):

$$\frac{\text{Slope (Variant)}_{405 \text{ nm}} - \text{Slope (EV)}_{405 \text{ nm}}}{\text{Slope (WT)}_{405 \text{ nm}} - \text{Slope (EV)}_{405 \text{ nm}}}$$

### 1.8. Protein expression and purification

The recombinant vectors of *pET28a-BarGT-1*, *pET28a-BarGT-2* and *pET28a-BarGT-3* were transformed into *E. coli* BL21 (DE3) chemical competent cells for protein expression. 2 mL seeding transformants (active variants or WT) were transferred into a 300 mL flask containing 100 mL LB media (kanamycin, 40 µg/mL) for large-scale cultivation at 37°C until OD reached 0.4~0.6 and induced by adding IPTG (0.1 mM) for protein expression at 16°C for extra 20 h. The cell pellets were harvested by centrifugation at 4000 rpm for 20 min, washed twice with a Tris-HCl buffer (50 mM Tris-HCl, pH 7.5) and resuspended in 10 mL of the same buffer. The cells were sonicated in ice-water mixture (10 min, 10 s pulse, 20 s pause, 60% amplitude), and the supernatant was collected by centrifugation at 4000 rpm for 30 min at 4°C. The target proteins were further

analyzed by the 12% sodium dodecyl sulfate-polyacrylamide gel electrophoresis (SDS-PAGE).

After being treated with 0.45 µm filters, the supernatants were purified using a His-Tag Ni-IDA column (MACHEREY-NAGEL, Dueren, Germany). The binding proteins were eluted with a Tris-HCl buffer (50 mM Tris-HCl, pH 7.5) containing different concentrations of imidazole (20 mM, 50 mM, 100 mM, 150 mM and 200 mM), and the eluates were analyzed by SDS-PAGE. Imidazole was removed from the protein solution by using ultrafiltration tubes (30 kDa, Millipore, Schwalbach, Germany). The concentrated protein samples were stored at -80°C for purified GTs assays.

### **1.9. *In vitro* glycosylation reactions**

The purified GTs were subjected to *in vitro* glycosylation reactions. Each reaction was performed in a mixture (100 µL) containing final concentrations of 50 mM Tris-HCl buffer, 10 mM MgCl<sub>2</sub>, 2 mM UDPG, 1 mM substrate (dissolved in DMSO) and 200 µg/mL each protein. All the above reactions were terminated with an equal volume of methanol. After centrifugation at 14,000 rpm for 30 min to remove protein precipitates, the reaction mixtures were analyzed by HPLC-MS.

### **1.10. HPLC-PDA, MS and NMR assays**

The samples were subjected to HPLC-PDA (HPLC, Nexera X2, Shimadzu Deutschland GmbH, Duisburg, Germany) equipped with a C18 column (YMC CO., LTD, C18, 250 mm×4.6 mm, 5 µm), and equipped with an ESI-MS single quadrupole mass detector (ThermoFisher Scientific Surveyor MSQ Plus, Illinois, USA). Masses were determined via the mass/charge ratio (*m/z*) in a positive mode with 55 V cone voltage and 3 KV needle voltage at 400°C. Products were detected by UV absorbance from 200 to 400 nm. The binary mobile phase consisted of solvent A (HPLC grade purity water) and solvent B (HPLC grade purity acetonitrile) at a flow rate of 1 mL/min. HPLC methods used for analysis of glycosylated products are detailed in **Table S5**. For the preparative scale reaction, a 20 mL system containing enzyme (500 µg/mL), 10 mM sugar donors, 5 mM substrate (dissolved in DMSO), 50 mM Tris-HCl (pH 7.5) buffer, and 10 mM MgCl<sub>2</sub> was used. The reaction was incubated for 6 h at 37°C and stopped by adding the same volume of methanol. After centrifugation at 14,000 rpm and 4°C for 30 min, the supernatant was concentrated by rotary

evaporator, and separated by reversed-phase semipreparative HPLC (Shimadzu Deutschland GmbH, Duisburg, Germany) using a C<sub>18</sub> column (CS-Chromatographie Service GmbH, Dueren, Germany, 125 mm × 8 mm, 10 μm) at a flow rate of 1 mL/min. 1D and 2D NMR spectra of each product (~ 10 mg) were recorded on a Bruker Avance III 400 NMR spectrometer (Bruker BioSpin, Germany).

### **1.11. Identification of kinetic parameters**

Kinetic parameters of BarGT-3 and its variants for the glycosylation of substrate **1** (acetaminophen) were measured in a reaction mixture (100 μL) with Tris–HCl buffer (50 mM Tris–HCl, pH 7.5, 10 mM MgCl<sub>2</sub>) containing 20 μg enzyme, 4 mM UDPG and different concentrations of substrate **1** at 37°C for 10 min (triplicate and repeat 3 times). The samples were quenched with an equal volume of methanol and analyzed by HPLC. The kinetic values were determined by fitting the Michaelis–Menten curve to the data using the nonlinear regression method (**Figure S38**).

### **1.12. Computational analysis**

The AlphaFold2 server is used to generate the structures of GT BarGT-3 and its variant I63P/H108G.<sup>8</sup> PROCHECK was used for the Ramachandran plot analysis.<sup>9</sup> The molecular dynamics (MD) simulations toward BarGT-3 or the variant were carried out by Yet Another Scientific Artificial Reality Application (YASARA, version 21.12.19).<sup>10</sup> The hydrogen bonding network and a pKa prediction were optimized to increase the solute stability and fine-tune the protonation states of protein residues (pH of 7.4 was selected), respectively.<sup>11</sup> The system was balanced in a net charge of zero, which was neutralized by Na<sup>+</sup> and Cl<sup>-</sup>. The AMBER14 force field was used for the residues of BarGT-3.<sup>12</sup> The BarGT-3 or its variant were centered in a 10 Å simulation cell by using a periodic boundary. The box was filled with around 30394 water molecules. After the steepest descent and simulated annealing minimizations to remove clashes, the simulation system was performed at 298 K, pH 7.4 for 100 ns. The simulation snapshots were captured every 100 ps. The atomic type and force field parameters are taken from GAFF force field.<sup>13</sup> GROMACS tools and YASARA “md\_analyze.mcr” macro were utilized for trajectory analysis.



## 2. $^1\text{H}$ and $^{13}\text{C}$ NMR spectral data for glycosylated products 1a-9a

### 1a

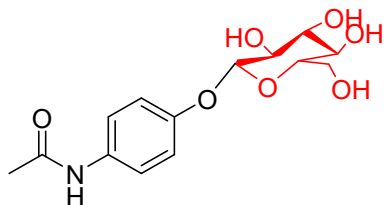

$^1\text{H}$  NMR (400 MHz,  $\text{DMSO-}d_6$ )  $\delta$  9.83 (s, 1H), 7.47 (d,  $J = 9.0$  Hz, 2H), 6.96 (d,  $J = 9.0$  Hz, 2H), 5.29 (s, 1H), 5.05 (d,  $J = 25.8$  Hz, 2H), 4.77 (d,  $J = 7.4$  Hz, 1H), 4.57 (s, 1H), 3.68 (d,  $J = 11.5$  Hz, 1H), 3.45 (d,  $J = 11.6$  Hz, 1H), 3.37 (s, 1H), 3.27 – 3.10 (m, 3H), 2.00 (s, 3H).  $^{13}\text{C}$  NMR (101 MHz,  $\text{DMSO}$ )  $\delta$  167.9, 153.2, 133.7, 120.2, 116.4, 100.8, 77.0, 76.7, 73.3, 69.7, 62.1, 60.7, 58.1, 23.9.

### 2a

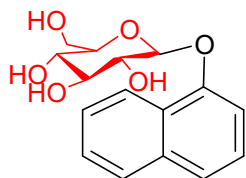

$^1\text{H}$  NMR (400 MHz,  $\text{DMSO-}d_6$ )  $\delta$  8.33 (d,  $J = 7.4$  Hz, 1H), 7.88 (d,  $J = 8.7$  Hz, 1H), 7.52 (dq,  $J = 12.8, 6.8, 5.6$  Hz, 3H), 7.42 (t,  $J = 8.0$  Hz, 1H), 7.19 (d,  $J = 7.6$  Hz, 1H), 5.47 (d,  $J = 5.4$  Hz, 1H), 5.13 (d,  $J = 4.8$  Hz, 1H), 5.05 (d,  $J = 5.2$  Hz, 1H), 5.01 (d,  $J = 7.7$  Hz, 1H), 4.59 (t,  $J = 5.7$  Hz, 1H), 3.73 (dd,  $J = 11.6, 5.3$  Hz, 1H), 3.54 – 3.47 (m, 1H), 3.45 – 3.41 (m, 1H), 3.40 – 3.33 (m, 2H), 3.23 (td,  $J = 9.1, 5.3$  Hz, 1H).  $^{13}\text{C}$  NMR (101 MHz,  $\text{DMSO}$ )  $\delta$  153.0, 134.0, 127.3, 126.4, 126.1, 125.3, 122.1, 121.3, 109.0, 101.1, 77.2, 76.6, 73.4, 69.8, 60.7.

### 3a

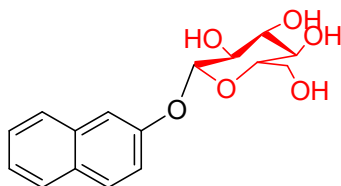

$^1\text{H}$  NMR (400 MHz,  $\text{DMSO-}d_6$ )  $\delta$  7.86 (d,  $J = 3.2$  Hz, 1H), 7.84 (s, 1H), 7.79 (d,  $J = 8.2$  Hz, 1H), 7.46 (t,  $J = 5.9$  Hz, 2H), 7.37 (t,  $J = 7.1$  Hz, 1H), 7.26 (dd,  $J = 8.9, 2.4$  Hz, 1H), 5.38 (d,  $J = 4.6$  Hz, 1H), 5.13 (d,  $J = 4.3$  Hz, 1H), 5.06 (d,  $J = 5.3$  Hz, 1H), 5.03 (d,  $J = 7.3$  Hz, 1H), 4.60 (t,  $J = 5.7$  Hz, 1H), 3.73 (dd,  $J = 11.6, 3.7$  Hz, 1H), 3.50 (dt,  $J = 11.8, 6.0$  Hz, 1H), 3.45 – 3.39 (m, 1H), 3.31 (q,  $J = 5.7$  Hz, 2H), 3.26 – 3.14 (m, 1H).  $^{13}\text{C}$  NMR (101 MHz,  $\text{DMSO}$ )  $\delta$  155.7, 134.5, 129.7, 129.5, 128.0, 127.4, 126.8, 124.5, 119.3, 110.9, 101.0, 77.6, 77.2, 73.8, 70.2, 61.2.

### 4a

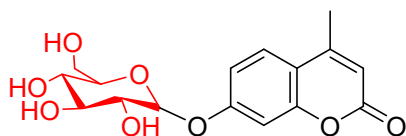

**<sup>1</sup>H NMR (400 MHz, DMSO-*d*<sub>6</sub>)** δ 7.70 (d, *J* = 9.1 Hz, 1H), 7.03 (d, *J* = 7.7 Hz, 2H), 6.25 (s, 1H), 5.39 (d, *J* = 4.7 Hz, 1H), 5.12 (d, *J* = 4.5 Hz, 1H), 5.04 (dd, *J* = 8.6, 6.3 Hz, 2H), 4.58 (t, *J* = 5.5 Hz, 1H), 3.70 (dd, *J* = 10.1, 5.3 Hz, 1H), 3.52 – 3.38 (m, 2H), 3.30 – 3.23 (m, 2H), 3.22 – 3.09 (m, 1H), 2.41 (s, 3H). **<sup>13</sup>C NMR (101 MHz, DMSO)** δ 160.6, 160.6, 154.9, 153.8, 126.9, 114.6, 113.9, 112.2, 103.7, 100.5, 77.6, 77.0, 73.6, 70.1, 61.1, 18.6.

5a

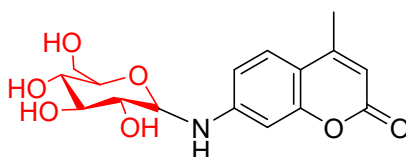

**<sup>1</sup>H NMR (400 MHz, DMSO-*d*<sub>6</sub>)** δ 7.49 (d, *J* = 8.7 Hz, 1H), 7.27 (d, *J* = 7.5 Hz, 1H), 6.73 (dd, *J* = 8.7, 2.1 Hz, 1H), 6.57 (d, *J* = 2.0 Hz, 1H), 5.99 (s, 1H), 5.01 (d, *J* = 25.8 Hz, 4H), 4.45 (t, *J* = 8.0 Hz, 2H), 3.66 (d, *J* = 11.4 Hz, 1H), 3.27 (t, *J* = 8.5 Hz, 2H), 3.19 (t, *J* = 8.6 Hz, 1H), 3.12 (t, *J* = 9.1 Hz, 1H), 2.33 (s, 3H). **<sup>13</sup>C NMR (101 MHz, DMSO)** δ 161.1, 155.6, 154.2, 151.8, 126.3, 111.5, 110.5, 108.9, 98.9, 84.5, 78.1, 73.4, 70.6, 61.4, 61.4, 18.5.

6a

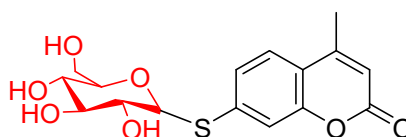

**<sup>1</sup>H NMR (400 MHz, DMSO-*d*<sub>6</sub>)** δ 7.66 (d, *J* = 8.4 Hz, 1H), 7.42 (s, 1H), 7.37 (d, *J* = 9.9 Hz, 1H), 6.33 (s, 1H), 5.46 (d, *J* = 5.1 Hz, 1H), 5.17 (s, 1H), 5.10 – 5.00 (m, 1H), 4.84 (d, *J* = 9.7 Hz, 1H), 4.64 (t, *J* = 5.0 Hz, 1H), 3.77 – 3.61 (m, 1H), 3.36 – 3.21 (m, 3H), 3.14 (t, *J* = 8.6 Hz, 2H), 2.40 (s, 3H). **<sup>13</sup>C NMR (101 MHz, DMSO)** δ 160.2, 153.6, 153.6, 141.6, 125.9, 124.5, 117.8, 115.5, 113.9, 86.2, 81.5, 78.5, 72.9, 70.2, 61.4, 18.5.

7a

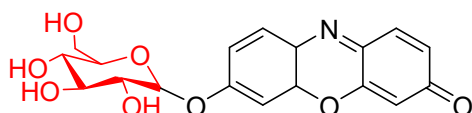

**<sup>1</sup>H NMR (400 MHz, DMSO-*d*<sub>6</sub>)** δ 7.78 (d, *J* = 8.8 Hz, 1H), 7.53 (d, *J* = 9.8 Hz, 1H), 7.24 – 6.98 (m, 2H), 6.79 (dd, *J* = 9.8, 2.0 Hz, 1H), 6.28 (d, *J* = 1.9 Hz, 1H), 5.46 (d, *J* = 4.5 Hz, 1H), 5.17 (d, *J* = 4.4 Hz, 1H), 5.11 (t, *J* = 6.5 Hz, 2H), 4.62 (t, *J* = 5.4 Hz, 1H), 3.71 (dd, *J* = 9.6, 5.1 Hz, 1H), 3.53 – 3.40 (m, 2H), 3.35 – 3.24 (m, 4H), 3.18 (q, *J* = 7.3, 6.3 Hz, 1H). **<sup>13</sup>C NMR (101 MHz, DMSO)** δ

185.9, 161.4, 150.2, 146.2, 145.4, 135.4, 134.4, 131.7, 129.0, 115.3, 106.2, 103.1, 100.5, 77.6, 76.9, 73.6, 70.0, 61.1.

**8a**

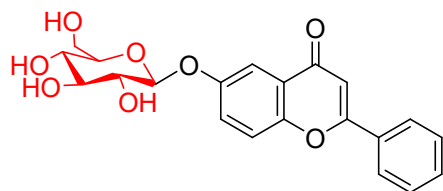

**<sup>1</sup>H NMR (400 MHz, DMSO-*d*<sub>6</sub>)** δ 8.20 – 8.03 (m, 2H), 7.79 (d, *J* = 9.1 Hz, 1H), 7.57 (ddt, *J* = 21.7, 9.1, 4.1 Hz, 5H), 7.03 (s, 1H), 5.39 (d, *J* = 4.4 Hz, 1H), 5.12 (d, *J* = 3.5 Hz, 1H), 5.04 (d, *J* = 5.0 Hz, 1H), 4.98 (d, *J* = 7.2 Hz, 1H), 4.59 (t, *J* = 5.6 Hz, 1H), 3.70 (dd, *J* = 11.7, 3.4 Hz, 1H), 3.51 (dt, *J* = 11.6, 5.7 Hz, 1H), 3.40 – 3.35 (m, 1H), 3.30 – 3.16 (m, 3H). **<sup>13</sup>C NMR (101 MHz, DMSO)** δ 177.3, 162.9, 155.2, 151.5, 132.3, 131.7, 129.6, 127.1, 126.8, 124.6, 124.5, 120.5, 109.9, 108.1, 106.7, 101.5, 77.6, 76.9, 73.8, 70.0, 61.1.

**9a**

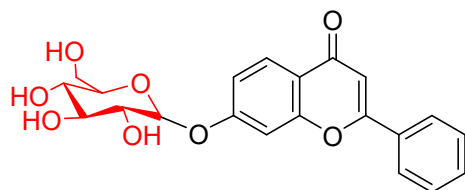

**<sup>1</sup>H NMR (400 MHz, DMSO-*d*<sub>6</sub>)** δ 8.10 (dd, *J* = 8.0, 1.6 Hz, 2H), 7.97 (d, *J* = 8.8 Hz, 1H), 7.64 – 7.57 (m, 3H), 7.41 (d, *J* = 2.3 Hz, 1H), 7.15 (dd, *J* = 8.8, 2.3 Hz, 1H), 6.99 (s, 1H), 5.14 (d, *J* = 7.3 Hz, 1H), 3.72 (d, *J* = 9.9 Hz, 2H), 3.51 – 3.46 (m, 3H), 3.35 – 3.29 (m, 3H), 3.20 (t, *J* = 8.9 Hz, 2H). **<sup>13</sup>C NMR (101 MHz, DMSO)** δ 176.9, 162.9, 162.2, 157.6, 132.2, 131.7, 129.6, 126.7, 126.7, 118.5, 116.0, 107.3, 104.3, 100.5, 77.7, 77.0, 73.6, 70.0, 61.3, 61.1, 40.9.

### 3. Additional Tables and Figures

**Table S1.** Genbank numbers of GTs in the nBGT branches (nBGT-1, -2, and -3 branch).

| nBGT-1 branch |          |          |              | nBGT-2 branch |          |          | nBGT-3 branch |          |          |              |
|---------------|----------|----------|--------------|---------------|----------|----------|---------------|----------|----------|--------------|
| AKO92307      | AS183653 | QIE37132 | AWU5342<br>7 | QCJ40852      | QEL79606 | QGY35731 | AXI30570      | QFQ25983 | QDQ05736 | ACP14091     |
| QDZ79798      | ARO61460 | ALL24124 | ASE27575     | AKP45588      | AMX77761 | QEF17374 | AXI29309      | QCC40235 | AFQ12710 | ACK91009     |
| AEN88948      | AKE17019 | QKH57482 | AQM46545     | ASS95367      | ALL59140 | QCX94685 | QCY28547      | QEL73654 | AAP25969 | QKH72916     |
| AWD6792<br>1  | QFQ26430 | AJH76572 | APT26090     | AGK54606      | AKJ61866 | ASK14909 | AJ25776       | QEL68377 | ASI77642 | AJK35990     |
| QFY73879      | AOM05681 | AIE79619 | ANR58054     | AMM93225      | AJK43082 | ARV92898 | QJX81068      | QCT44488 | AOY15547 | QKU27705     |
| AKP78182      | QFR29855 | AIY75337 | ANR52759     | QIZ06182      | AJA20125 | ANS48396 | QCY28428      | QBZ25094 | QCU11396 | QKU12805     |
| AXI30102      | QEF17221 | AJG96512 | ANR47460     | AIE59987      | AIE34220 | AAP09752 | AJ25618       | ASI83079 | ADY21406 | QKU11542     |
| AUO10047      | ADH07188 | AJ06405  | ANR42170     | AFU13409      | AHZ51797 |          | AYF07158      | ASI72506 | QEL84803 | QKH65586     |
| ADF39976      | QCT44954 | ARO18384 | ANR36874     | AXK18725      | QKH15880 |          | QKO33960      | ARO65285 | AIW85562 | QKH26912     |
| QCY26091      | QBZ25613 | BAL18312 | ANR31570     | QHA18026      | QKH06032 |          | AOY16482      | AKE16462 | QBP91709 | QIY27416     |
| AJ21740       | ASI72979 | ASI78066 | ANR26269     | AHA06092      | QDZ74023 |          | QDQ06588      | AVR31858 | ARJ21792 | QIY24192     |
| QJX76752      | QGY35592 | AAT54769 | ANR20969     | QEQ17642      | QIZ42715 |          | ASI78483      | QCY61166 | AJH19105 | QIY20227     |
| AYE50448      | QCC40734 | AFQ12216 | ANR10369     | ARC27942      | ARX66651 |          | AFQ11761      | ARV92241 | ABY43166 | QIY14818     |
| ADE70132      | AZR77437 | QHH88309 | ANR05072     | ABY43802      | BCA31822 |          | AIE79969      | QGY35100 | QIW18740 | QHD21881     |
| QLC87973      | BAR84180 | QCU10944 | ANH86767     | ARJ22432      | AHX18834 |          | AAT31200      | QEF16730 | AZJ20240 | QHA64704     |
| QDZ85886      | QLF01873 | ADY21879 | AMC04577     | QBP91130      | QHV04619 |          | QCY64928      | QCX93999 | AYF06111 | QHA63532     |
| QCR28179      | ASK14747 | AAU17876 | ALC34716     | AIW84865      | QHV46425 |          | ACM15767      | AAP09035 | AZQ47999 | QHA58412     |
| AVX09102      | ALZ61621 | AUD26034 | BAR76650     | AJH21198      | AND08241 |          | ASZ17681      | AZR76915 | AJG92909 | QHA50907     |
| AQU74603      | QJU34994 | AXO98681 | AJM81107     | QEL85441      | ACK97105 |          | QKH10521      | ATI59305 | AIY77413 | QHA44171     |
| ANF46916      | AQQ63262 | QBJ68344 | AJ38545      | AYF06867      | AQY39298 |          | QKH04759      | QJU35461 | ARO17947 | QHA39772     |
| BBK95448      | AAP09581 | AXO93311 | AJH94493     | ALQ68388      | AXR17389 |          | ANC22789      | AQQ62754 | AJ05851  | QCX56408     |
| AJ114555      | QCX94525 | AOY16041 | AJH90397     | QDF22468      | AXR23120 |          | AYF85303      | ANC19090 | QDF23177 | AWU5292<br>3 |
| AIK35241      | ARV92760 | QK118600 | AJH97227     | AXY09564      | QKH21836 |          | AMR05901      | ANP81107 | AXY10282 | ASE32253     |
| QCS53509      | AUB64188 | AJH84742 | AJH53825     | ATI53055      | QFP89258 |          | AWC6079       | AYF79901 | QKI24588 | AQM46029     |
| AQX55196      | AJA19978 | QK114904 | AJH38570     | ALL24258      | QBM62490 |          | AWC4456       | AMR02476 | AJ36413  | APT25574     |
| ALC81527      | AMX77913 | QKH02285 | AJH36431     | QIE37262      | QBC62443 |          | AWC3654       | ACK63108 | ATI52459 | AHE83486     |
| AKR09638      | AKJ61711 | AJ11247  | AJH28258     | QKH57353      | QBC57218 |          | AWC3251       | QLF01436 | AAU18367 | ANR57567     |
| AOM11265      | AIE34382 | AJG62268 | AJG88662     | AJH73272      | QBC51988 |          | ABS21876      | ASK14182 | AXO92776 | ANR52272     |
| QFY00254      | AHZ51966 | QKQ42541 | AJG80787     | QBJ68481      | AND24623 |          | AWC5668       | ADH06668 | QB67832  | ANR46975     |
| ANS48205      | AGE78948 | QKH31406 | AJG69806     | AXO93445      | AFQ26497 |          | AWC5255       | ASZ65770 | ALL23551 | ANR41683     |

|          |          |          |          |          |          |  |          |          |          |          |
|----------|----------|----------|----------|----------|----------|--|----------|----------|----------|----------|
|          |          |          |          |          |          |  | 6        |          |          |          |
| ANC13929 | ALL58984 | ABK85666 | AJG65727 | ARZ62874 | QCJ49685 |  | AWC4805  | BAR84744 | ASZ18155 | ANR36387 |
|          |          |          |          |          |          |  | 9        |          |          |          |
| ANC08107 | AJK43074 | AJH66958 | AJG46980 | QKH66248 | AJH03721 |  | AWC4012  | QFR29366 | QHH84611 | ANR31085 |
|          |          |          |          |          |          |  | 8        |          |          |          |
| AHA72074 | AIM31272 | ACO30839 | AJG29314 | AJH65579 | AKR09792 |  | AWC2848  | ALZ62237 | AIE79238 | ANR25784 |
|          |          |          |          |          |          |  | 8        |          |          |          |
| AVP48380 | AKR35599 | ASZ17703 | AJF90192 | ACK90322 | ASL65524 |  | AWC6481  | ARP57438 | QKH59125 | ANR20484 |
|          |          |          |          |          |          |  | 5        |          |          |          |
| ARP57993 | ASJ48848 | QHH85006 | AJA86820 | QKI18471 | AOM11443 |  | AIK36662 | AGG00769 | QIE36672 | ANR09882 |
| AGG01380 | QDZ73877 | QKH27401 | AIK54753 | QKH72254 | AVP48227 |  | AJH18252 | AFV17833 | AJH74544 | ANR04585 |
| AFV18433 | QDD83876 | AJG77446 | AIK62286 | AJK37207 | QFY00403 |  | AXK18081 | AEA15711 | QHH92190 | ANH86289 |
| AEA16298 | ANE85799 | QKH72394 | AIK60228 | AJH83040 | AHA72249 |  | AFU12716 | AUB64715 | EEL00975 | AMC04096 |
| QCY61747 | AHX18685 | QKH66108 | AIK34279 | QDQ06294 | AST01546 |  | QEQ17017 | ASL64755 | BAL17790 | ALC34232 |
| AYF84325 | QKH15725 | AJK33306 | AIK08693 | ALZ61473 | ARP58158 |  | ARC28624 | AVP43818 | QGG19884 | AHE89379 |
| ANP81578 | QKH06185 | AJH63079 | AIF56819 | ASI78190 | AGG01550 |  | AHA10508 | AOM10741 | QHG34794 | AJM80618 |
| AMR02971 | ANV71901 | ACK88962 | AHE89936 | ACM13064 | AFV18596 |  | QHA17341 | ALC53357 | QHA26401 | AJH38763 |
| AXR17223 | QEL79454 | QKE07672 | AHE84053 | QIW22576 | AEA16461 |  | QDD83276 | QFX99623 | AYY26653 | AJH96844 |
| AXR22945 | QIZ42564 | ARZ62737 | AAP26486 | AZJ20890 | ANC14087 |  | QEL78925 | ANS47663 | ACM12493 | AJH88375 |
| AFQ14800 | QEL74182 | QKI25077 | ACQ48454 | AJG96177 | ANC08266 |  | QHV47063 | ANC13314 | ACJ77544 | AJH01235 |
| AQY39098 | QEL68904 | AJH33394 | ACP14023 | ARO18515 | ADH07315 |  | QHV03977 | ANC07491 | ADK04697 | AJH62205 |
| AMR85067 | ARX66490 | ADK05248 |          | AJH05809 | AQK63417 |  | ALL59929 | AHA71485 | ACO26709 | AJH56121 |
| AJQ59336 | ANN32615 | AJH57017 |          | AIY73504 | QJU34852 |  | AJK42731 | AKR09134 | AEW55175 | AJH52019 |
| ACK96959 | BCA31658 | BBK95449 |          | AFQ12067 | QKO33670 |  | AIM32357 | AMR84536 | ABK85173 | AJH38450 |
| QGV08483 | QHV46578 | AHK38686 |          | ADY22023 | QBZ25778 |  | AMX76971 | AJQ58787 | AJH69939 | AJH37021 |
| QKH21635 | QHV04464 | AIM11887 |          | QCU10820 | ASI73129 |  | AKJ57264 | AQY38635 | QKQ42038 | AJH30070 |
| QFP89064 | AFU13263 | AIM06450 |          | AOY16180 | ARO60391 |  | AJA19468 | QGV08958 | QKI15452 | AJG89233 |
| QCJ49880 | QHA17887 | AFH83899 |          | ASZ17565 | QEL74332 |  | AIE33375 | QCJ50360 | QKH02781 | AJG83672 |
| QBM62311 | QEQ17508 | AAT31754 |          | QHH85108 | QEL69054 |  | AHZ50965 | AJH08239 | QKH30902 | AJG76214 |
| QBC62255 | ARC28077 | QKU12352 |          | QHG35329 | QCT45110 |  | AGE77890 | AFQ15382 | AJH10755 | AJG72481 |
| QBC57019 | AJH22268 | QKU07083 |          | QHA26970 | AVR32550 |  | QKH06722 | ACK96743 | AJG57414 | AJG63227 |
| QBC51797 | ARJ22349 | QIY26965 |          | AYY27255 | ASI83816 |  | QKH15190 | QKH21152 | AUD25561 | AJG48661 |
| AND24420 | AIW84961 | QIY23748 |          | BAL18449 | AKE17176 |  | QDZ73376 | QJU67094 | AXO98138 | AJG28830 |
| AND08095 | QEL85354 | QIY15808 |          | QGG19290 | ARO62529 |  | AHX18210 | QFP88588 | QKE07142 | AJF89710 |
| AJH04559 | ABY43707 | QIY15271 |          | ACJ81078 | ASZ66567 |  | ANE85312 | QBM61883 | ARZ62256 | AJA86366 |
| AFQ26279 | ALQ68242 | QHD22336 |          | ANE85944 | BAR84029 |  | ASJ48342 | QBC61786 | AIM11353 | AIK52342 |
| AZV66524 | QIW22107 | QHA64258 |          | QDD84047 | ALC52657 |  | AKR34955 | QBC56538 | BBK94905 | AIK64512 |
| ASL65356 | AYF06729 | QHA63090 |          | AGE78765 | ACK60575 |  | ARX65978 | QBC51322 | BBB72256 | AIK57480 |
| ASZ66412 | AZJ20754 | QHA54018 |          | AIM31459 | AOM05866 |  | QKO33032 | AZV66002 | BAR77186 | AIK31256 |
| ANC19652 | AZQ47631 | QHA51354 |          | ANV71756 | AZR77585 |  | BCA36388 | AXR16522 | AIM05932 | AIF56332 |
| QKO33526 | QDQ06158 | QHA48563 |          | ASJ48991 | QFR30009 |  | ANN32142 | AXR22255 | AIK08141 | AAT54250 |
| ACK62605 | QDF22625 | QHA40219 |          | AKR35750 | QCC40886 |  | ANV72408 | AND23938 | AHK38148 |          |
| ARO62609 | AXY09721 | QCX56919 |          | AIM31458 | ATI59942 |  | QIZ42088 | AND07562 | AFH83363 |          |

|          |          |          |  |          |          |  |          |          |          |  |
|----------|----------|----------|--|----------|----------|--|----------|----------|----------|--|
| AVR32392 | ATI52929 | BBB72787 |  | AGE78766 | QLF02022 |  | AOM05164 | AFQ25764 | ACQ47473 |  |
|----------|----------|----------|--|----------|----------|--|----------|----------|----------|--|

**Table S2.** GT sequence identity of BarGT-1, -2 and -3 in the nBGT branches with the typical GTs (YjiC, YojK and YdhE) in the main branches.

| <b>Identity (%)</b> | <b>BarGT-1</b> | <b>BarGT-2</b> | <b>BarGT-3</b> | <b>YjiC</b> | <b>YojK</b> |
|---------------------|----------------|----------------|----------------|-------------|-------------|
| <b>BarGT-2</b>      | 31.4           |                |                |             |             |
| <b>BarGT-3</b>      | 33.7           | 37.6           |                |             |             |
| <b>YjiC</b>         | 27.6           | 29.1           | 30.9           |             |             |
| <b>YojK</b>         | 30.8           | 37.7           | 43.6           | 30.8        |             |
| <b>YdhE</b>         | 52.7           | 30.1           | 32.8           | 28.2        | 33.9        |

**Table S3.** The specific activities (U/mg) of BarGT-3 (WT), I63P and I63P/H108G towards 9 substrates (Each reaction was performed in a 100  $\mu$ L mixture containing final concentrations of 50 mM Tris-HCl buffer, 10 mM MgCl<sub>2</sub>, 2 mM UDPG, 1 mM substrate and 200  $\mu$ g/mL each protein for 2 h at 37°C).

|           | <b>Specific activity (U/mg)</b> |             |                   |
|-----------|---------------------------------|-------------|-------------------|
|           | <b>WT</b>                       | <b>I63P</b> | <b>I63P/H108G</b> |
| <b>1a</b> | 0.004                           | 0.02        | 0.02              |
| <b>2a</b> | 0.03                            | 0.04        | 0.04              |
| <b>3a</b> | 0.04                            | 0.04        | 0.04              |
| <b>4a</b> | 0.03                            | 0.04        | 0.04              |
| <b>5a</b> | 0.01                            | 0.01        | 0.03              |
| <b>6a</b> | 0.01                            | 0.02        | 0.03              |
| <b>7a</b> | 0.01                            | 0.02        | 0.03              |
| <b>8a</b> | 0.03                            | 0.04        | 0.04              |
| <b>9a</b> | 0.03                            | 0.04        | 0.04              |



**Table S4.** The primers for casting *error-prone* PCR and SSM libraries.

| <b>Primers</b>     | <b>Primers Sequence (5' to 3')</b>              |
|--------------------|-------------------------------------------------|
| BarGT3-fragment1-F | CGGCCTGGTGCCGCGCGGCAGCCAT                       |
| BarGT3-fragment1-R | GGGCCACAAATTTATAGCTTTCAT                        |
| BarGT3-fragment2-F | TATCAGCCGCGCAGCGAAGTGTTTG                       |
| BarGT3-fragment2-R | GGTGCTCGAGTGCGGCCGCAAGCTT                       |
| BarGT-3-I63SSM-F   | GATTAACnnsATGGAACGCGTGAACGAAGGCG                |
| BarGT-3-I63SSM-R   | GTTCCATsnnGTTAATCTGACTCAGAAAGTTTTCAAACA         |
| BarGT-3-H108SSM-F  | TGATAACnnsTTTCCGGTGGGCCGCATTATTG                |
| BarGT-3-H108SSM-R  | CCGGAAAsnnGTTATCATAAATCAGATAATCATATTTTTCTT<br>C |

**Table S5.** HPLC methods and physical parameters for glycosylated products **1a-9a**.

| Substrate   | Analytical methods   | Preparative methods   | UV (nm) | Melting points (°C) | $\alpha/\beta$ nature of glycosidic linkage |
|-------------|----------------------|-----------------------|---------|---------------------|---------------------------------------------|
| <b>1</b>    | 5% solvent B, 25 min | 10% solvent B, 25 min | 257     | 198                 | O- $\beta$ -D-linkage                       |
| <b>2</b>    | 20-90% B, 30 min     | 35% B, 30 min         | 230     | 182                 | O- $\beta$ -D-linkage                       |
| <b>3</b>    | 20-90% B, 30 min     | 35% B, 30 min         | 230     | 183                 | O- $\beta$ -D-linkage                       |
| <b>4</b>    | 20-90% B, 30 min     | 20% B, 30 min         | 320     | 260                 | O- $\beta$ -D-linkage                       |
| <b>5</b>    | 20-90% B, 30 min     | 20% B, 30 min         | 320     | 254                 | O- $\beta$ -D-linkage                       |
| <b>6</b>    | 20-90% B, 30 min     | 20% B, 30 min         | 320     | 243                 | O- $\beta$ -D-linkage                       |
| <b>7</b>    | 20-90% B, 30 min     | 30% B, 30 min         | 320     | 220                 | O- $\beta$ -D-linkage                       |
| <b>8</b>    | 20-90% B, 30 min     | 35% B, 30 min         | 330     | 256                 | O- $\beta$ -D-linkage                       |
| <b>9</b>    | 20-90% B, 30 min     | 30% B, 30 min         | 330     | 258                 | O- $\beta$ -D-linkage                       |
| <b>4NPG</b> | 20% B, 30 min        | -                     | 350     | -                   | -                                           |

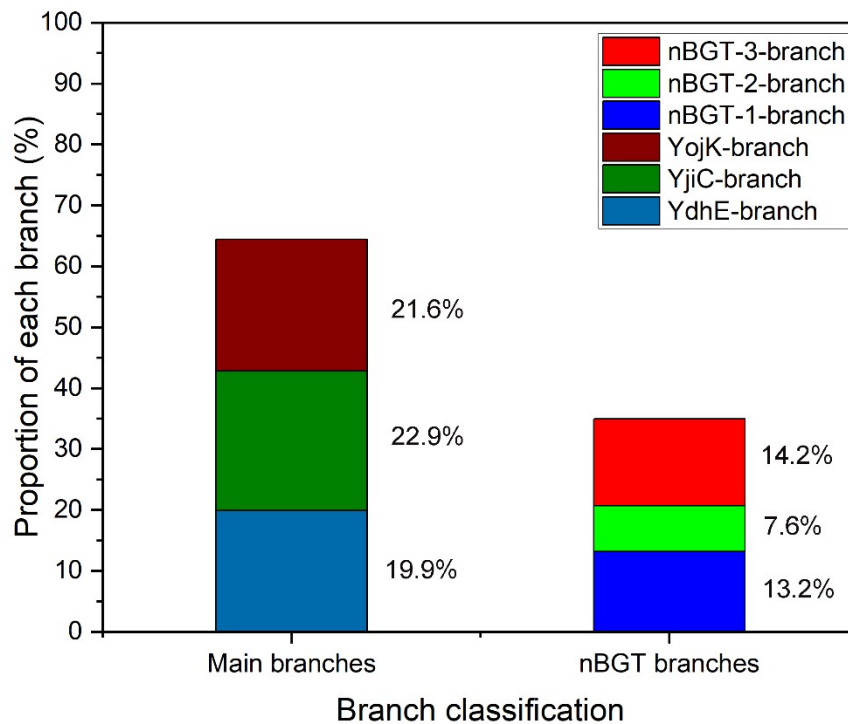

**Figure S1.** The proportion (%) of each branch in *Bacillus* GT1 family enzymes. YdhE-, YojK-, YjiC-branch (main branches) account for 19.9%, 22.9% and 21.6% of all GTs, respectively. nBGT-1-, nBGT-2-, nBGT-3-branch (novel *Bacillus* GTs branches) account for 13.2%, 7.6% and 14.2% of all GTs, respectively.

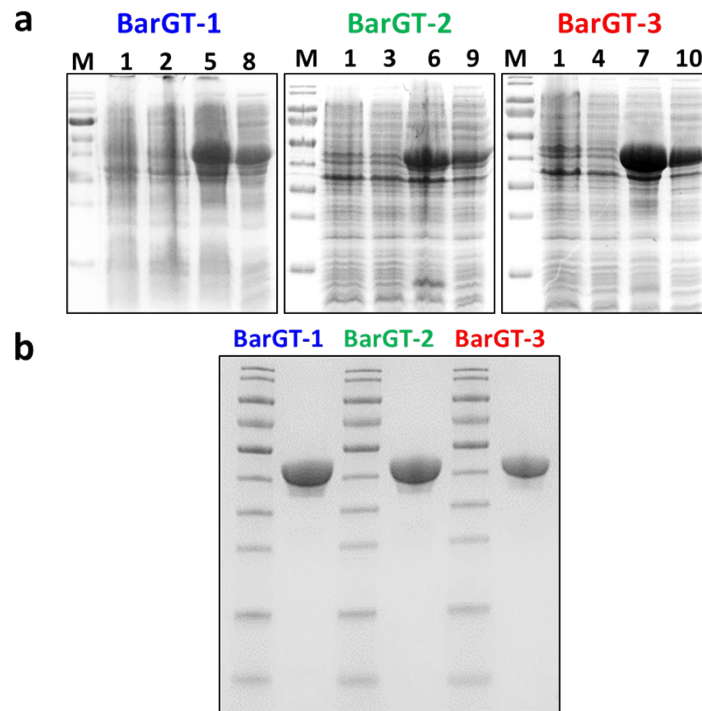

**Figure S2.** SDS-PAGE detection of the expression of BarGT-1, -2 and -3. (a). All of the GTs were soluble expression. M is the protein molecular weight marker, Lane 1, the control of pET 28a vector; Lanes 2-4, the *E. coli* lysate before induction; Lanes 5-7, the *E. coli* lysate after induction; Lanes 8-10, the soluble supernatants after induction. (b). the purified proteins of BarGT-1, -2 and -3.

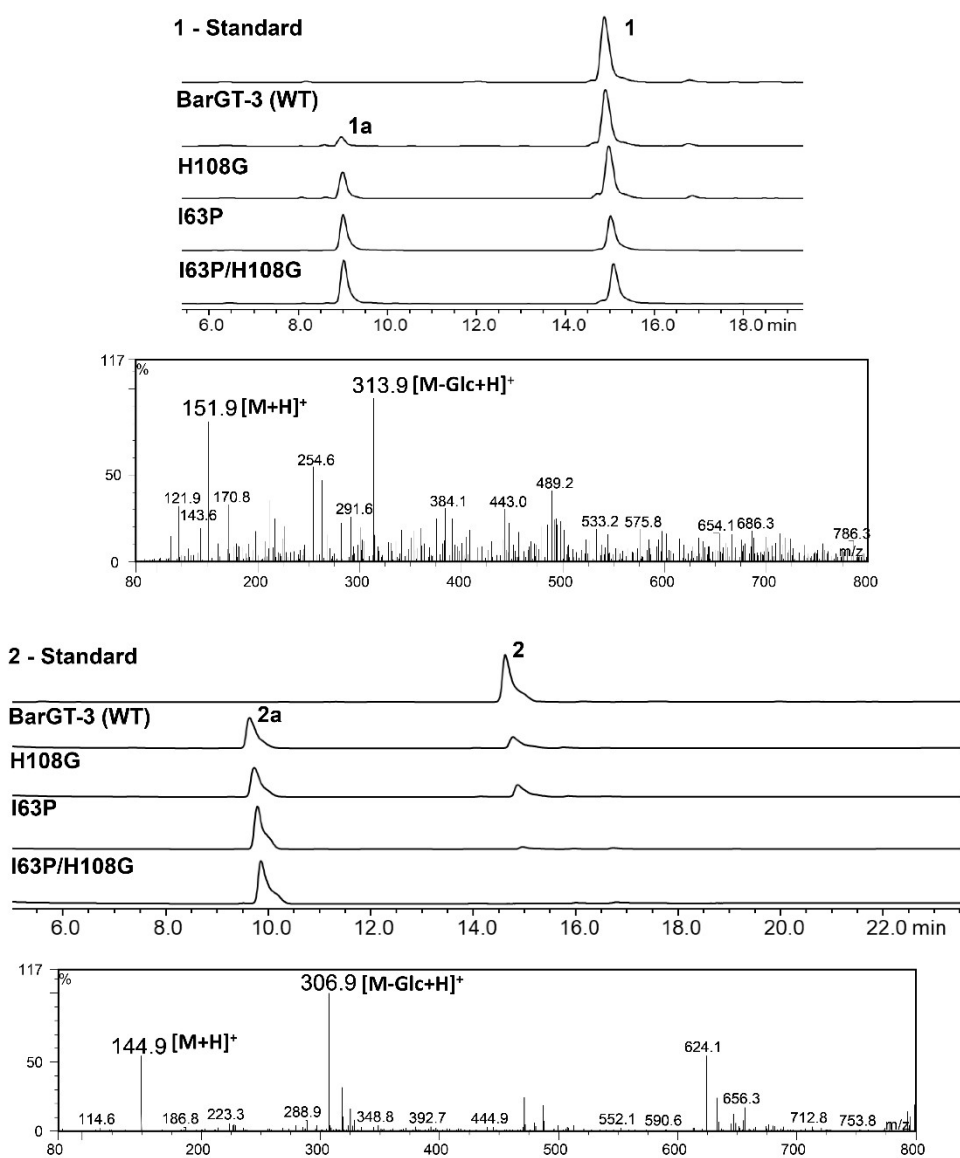

**Figure S3.** HPLC and positive ion mass spectrometry (MS) analysis for the products **1a** and **2a**. The activities toward substrates **1** and **2** ([M+H]<sup>+</sup>) of BarGT-3 and its variants were determined by HPLC, and the products **1a** and **2a** ([M-Glc+H]<sup>+</sup>) were identified by positive ion MS.

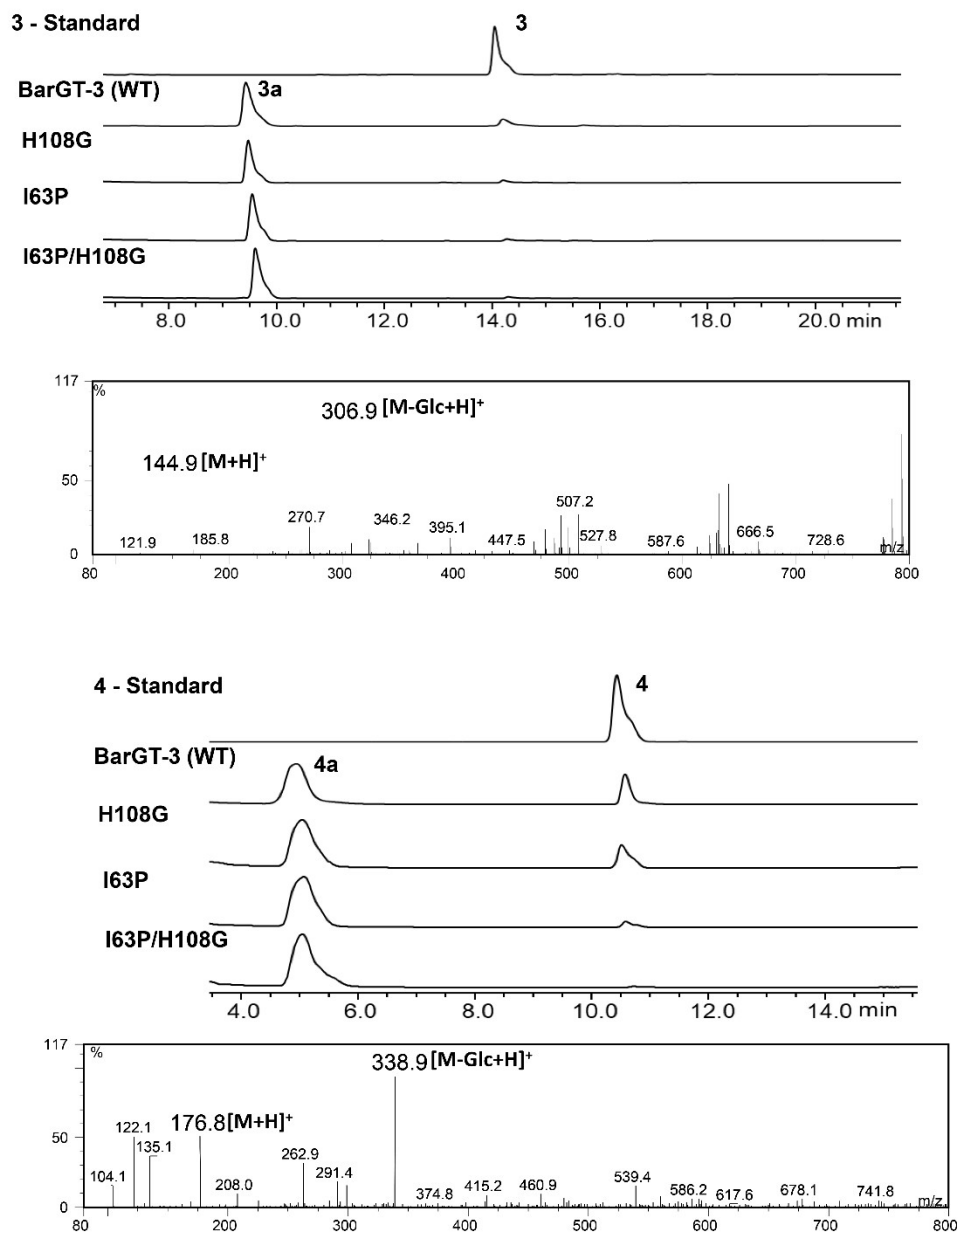

**Figure S4.** HPLC and positive ion mass spectrometry (MS) analysis for the products **3a** and **4a**. The activities toward substrates **3** and **4** ( $[M+H]^+$ ) of BarGT-3 and its variants were determined by HPLC, and the products **3a** and **4a** ( $[M-Glc+H]^+$ ) were identified by positive ion MS.

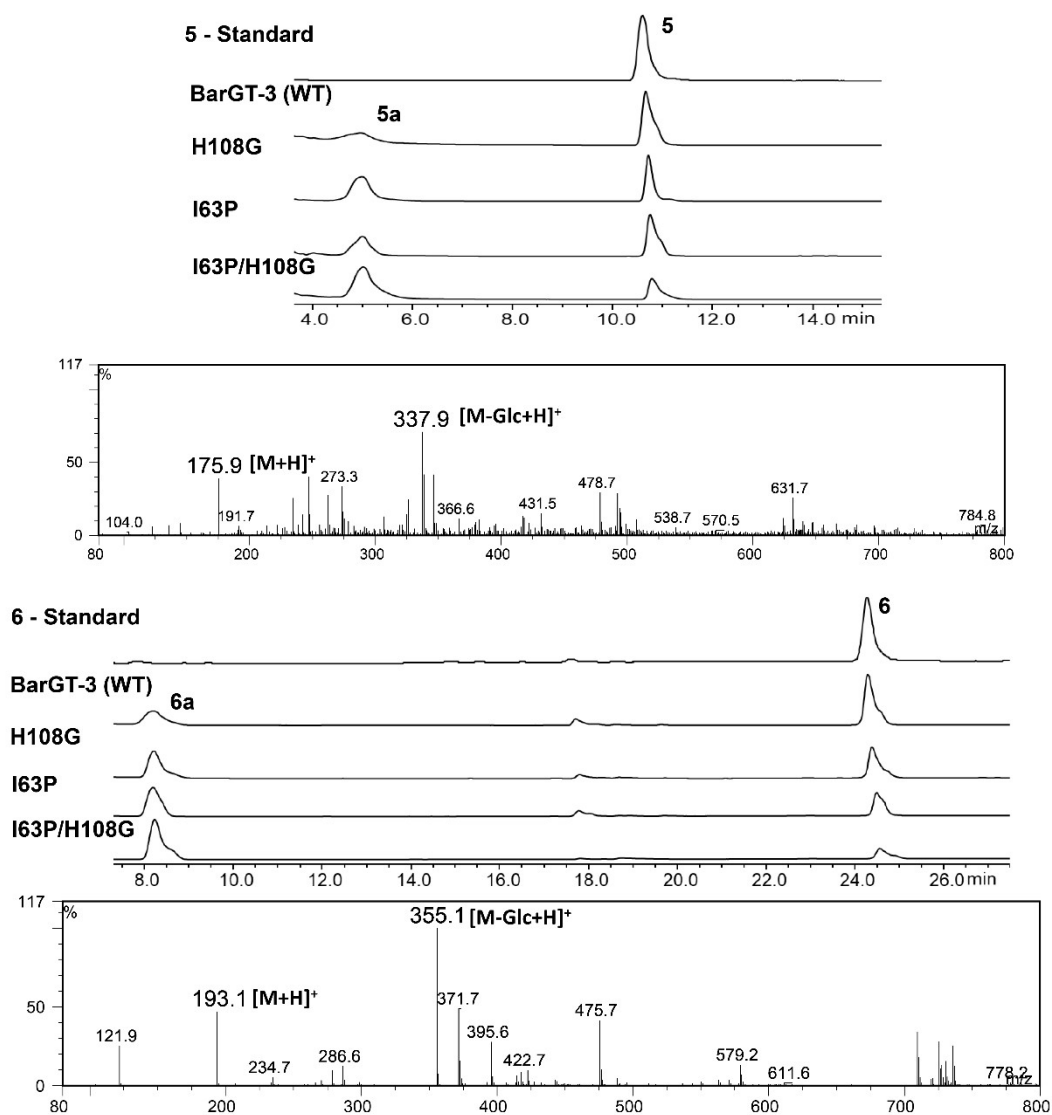

**Figure S5.** HPLC and positive ion mass spectrometry (MS) analysis for the products **5a** and **6a**. The activities toward substrates **5** and **6** ([M+H]<sup>+</sup>) of BarGT-3 and its variants were determined by HPLC, and the products **5a** and **6a** ([M-Glc+H]<sup>+</sup>) were identified by positive ion MS.

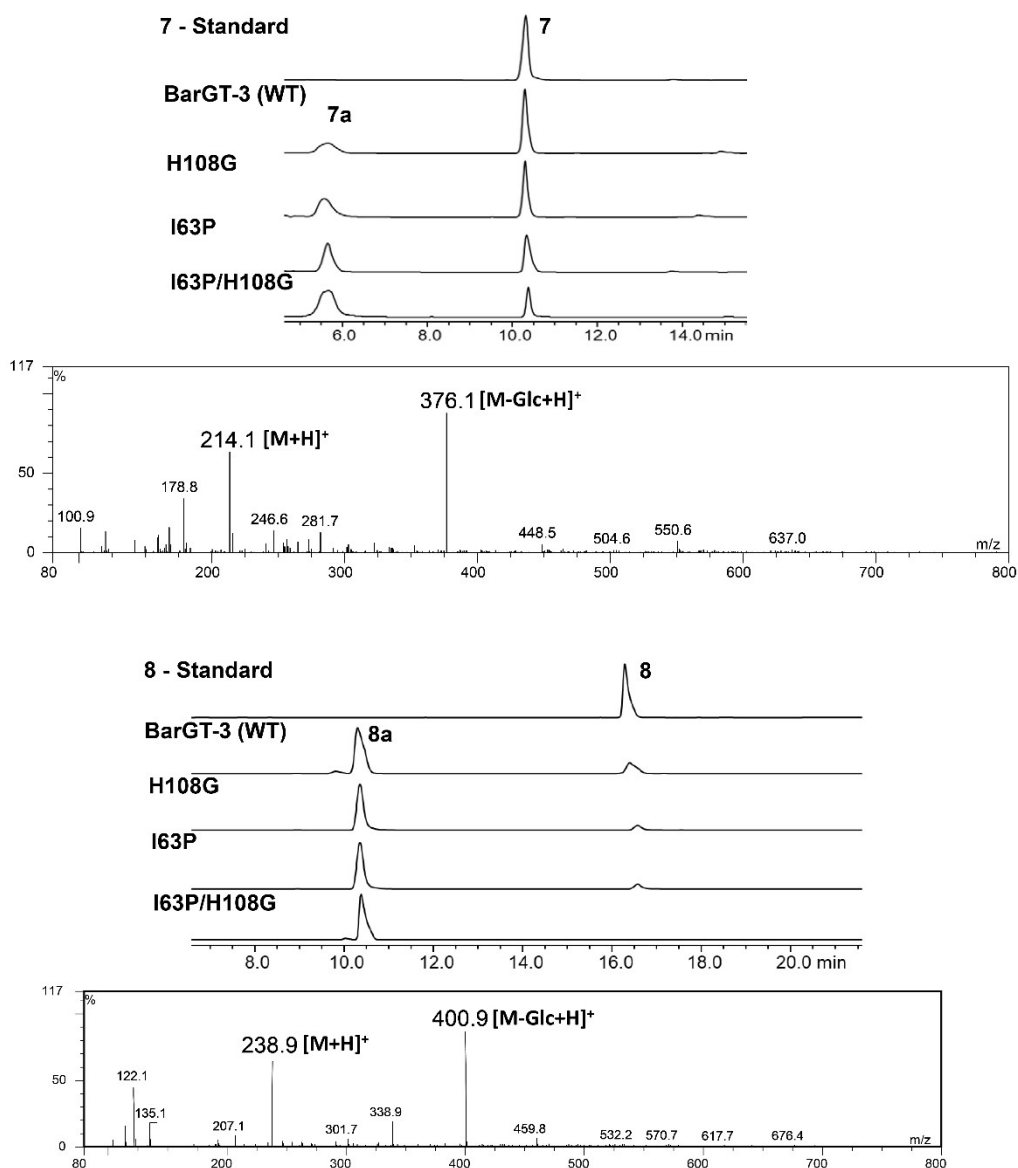

**Figure S6.** HPLC and positive ion mass spectrometry (MS) analysis for the products **7a** and **8a**. The activities toward substrates **7** and **8** ([M+H]<sup>+</sup>) of BarGT-3 and its variants were determined by HPLC, and the products **7a** and **8a** ([M-Glc+H]<sup>+</sup>) were identified by positive ion MS.



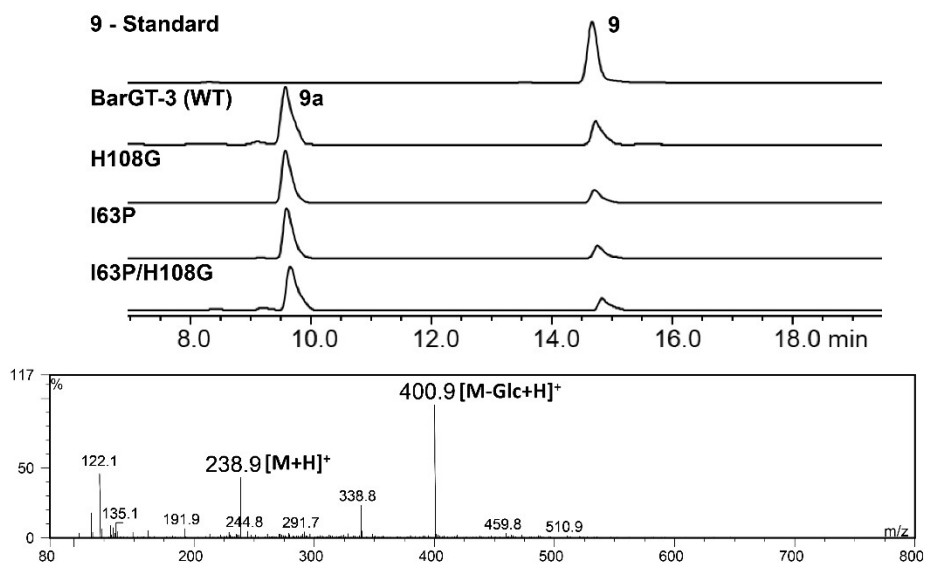

**Figure S7.** HPLC and positive ion mass spectrometry (MS) analysis for the product **9a**. The activities toward substrate **9** ( $[M+H]^+$ ) of BarGT-3 and its variants were determined by HPLC, and the product **9a** ( $[M-Glc+H]^+$ ) were identified by positive ion MS.

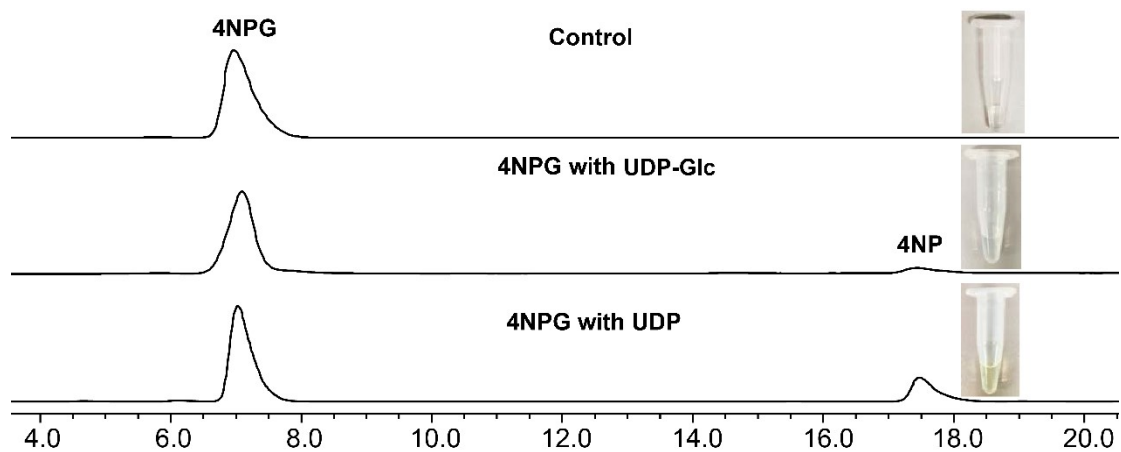

**Figure S8.** The verification of the catalytic reversibility of BarGT-3. The reverse reactions from 4NPG to UDP or UDPG catalyzed by BarGT-3 (WT), 100  $\mu$ L Tris-HCl buffer (50 mM, pH 7.5, 10 mM  $\text{MgCl}_2$ ) with 500  $\mu$ M of 4-nitrophenyl- $\beta$ -D-glucoside (4NPG), 100  $\mu$ M of UDP or UDPG.

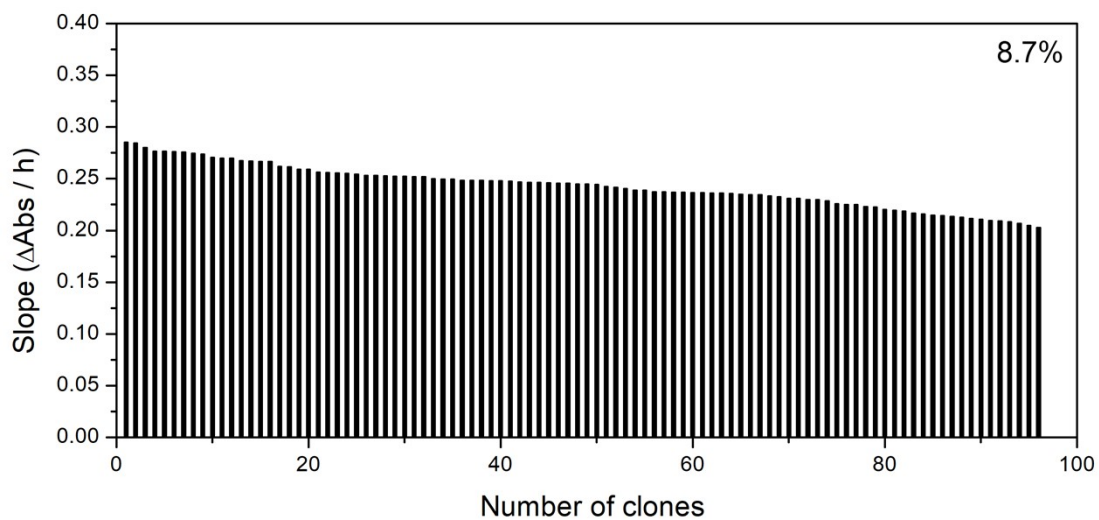

**Figure S9.** Optimization of coefficient of variation (CV) in the UDPG-recycling high-throughput system. CV is evaluated by a 96-well plate of BarGT-3 (WT). The lowest CV value is 8.7% in the condition of 20  $\mu$ L lysate and pH 7.5.

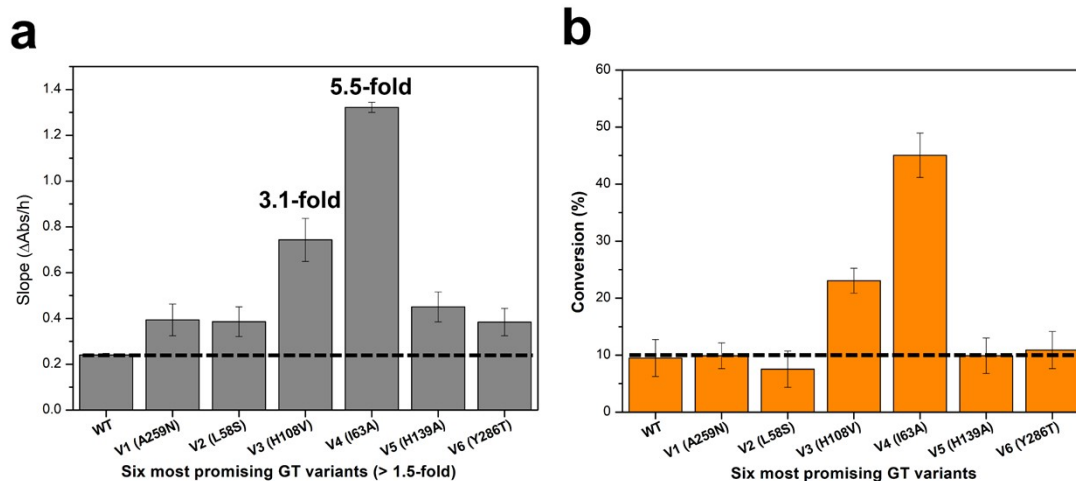

**Figure S10.** Six most promising variants screening from the cepPCR library. (a). 6 most promising GT variants (> 1.5-fold) were screened in high-throughput screening (HTS) system. (b). The conversions of lysates of 6 promising variants toward acetaminophen (substrate **1**).

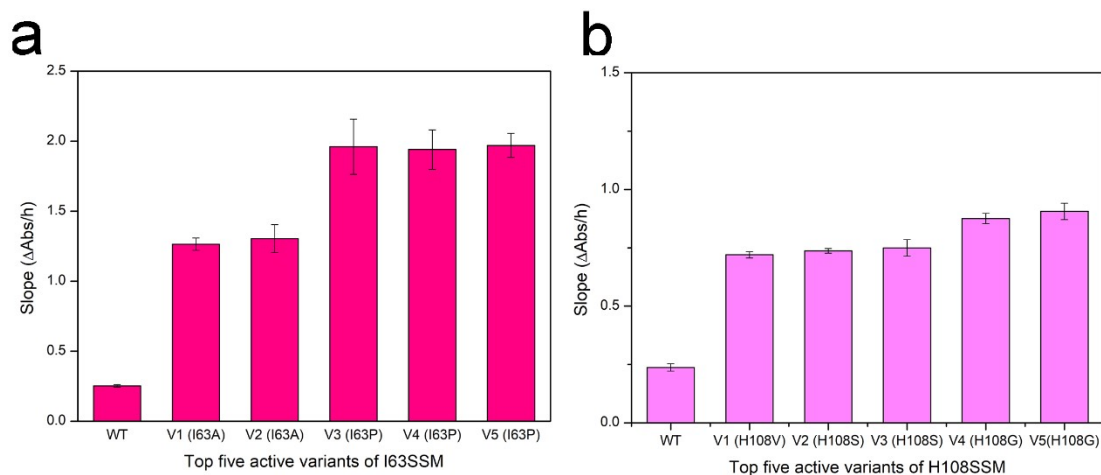

**Figure S11.** Top five active variants of site-saturation mutagenesis (SSM) libraries of I63 and H108. The best single variants for substrate **1** catalysis are proven to be I63P and H108G.

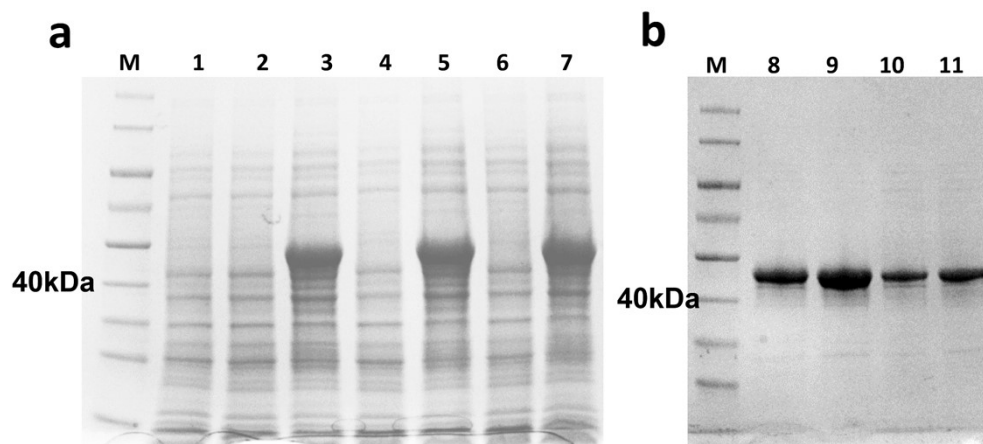

**Figure S12.** SDS-PAGE detection of the expression of variants I63P, H108G and I63P/H108G. (a). M is the protein molecular weight marker, Lane 1, the control of pET 28a vector; Lanes 2, 4 and 6, the *E. coli* lysate before induction of I63P, H108G and I63P/H108G; Lanes 3, 5 and 7, the soluble supernatants after induction of I63P, H108G and I63P/H108G. (b). M is the protein molecular weight marker, lanes 8-11, the purified proteins of BarGT-3, I63P, H108G and I63P/H108G.

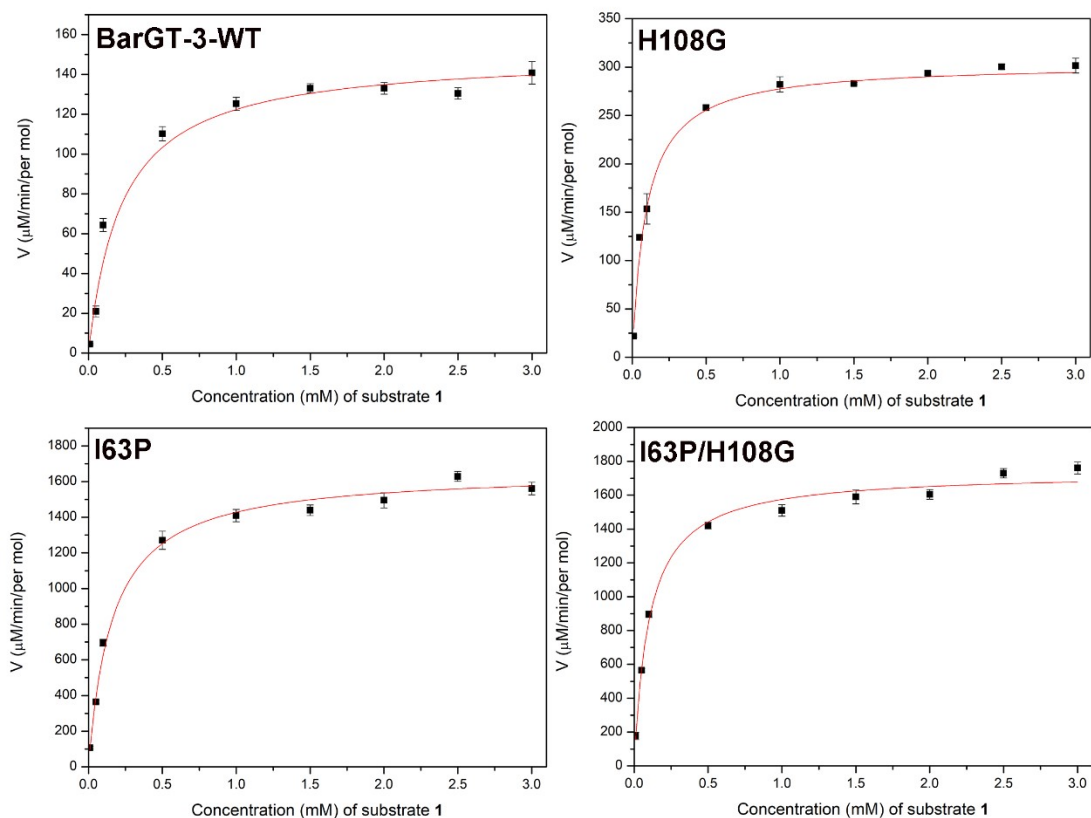

**Figure S13.** Kinetic parameters and fitting curves analysis of BarGT-3 (WT) and its variants. Determination of kinetic parameters for substrate 1 with saturated UDPG (4 mM). Enzyme assays were performed in 50 mM Tris- HCl buffer (pH 7.5) containing 20  $\mu\text{g}/\text{mL}$  protein and 10 mM  $\text{MgCl}_2$  at 37°C for 10 min in triplicate.

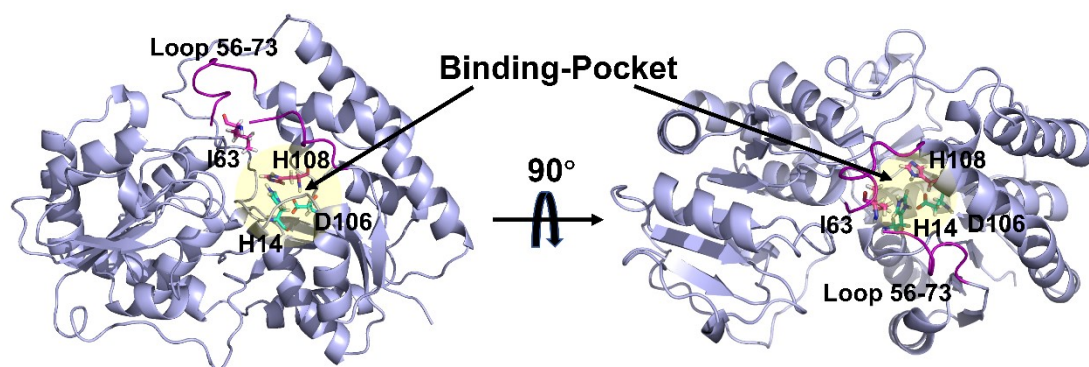

**Figure S14.** The positions of two identified residues I63 and H108 in the structural model of BarGT-3. The structure of BarGT-3 was constructed by AlphaFold2. The residue I63 was on a loop region (residue 56-73 at the N-domain, purple) above the substrate-binding pocket (yellow region). The identified residue H108 was located at the binding pocket of BarGT-3.



## BarGT-3\_WT

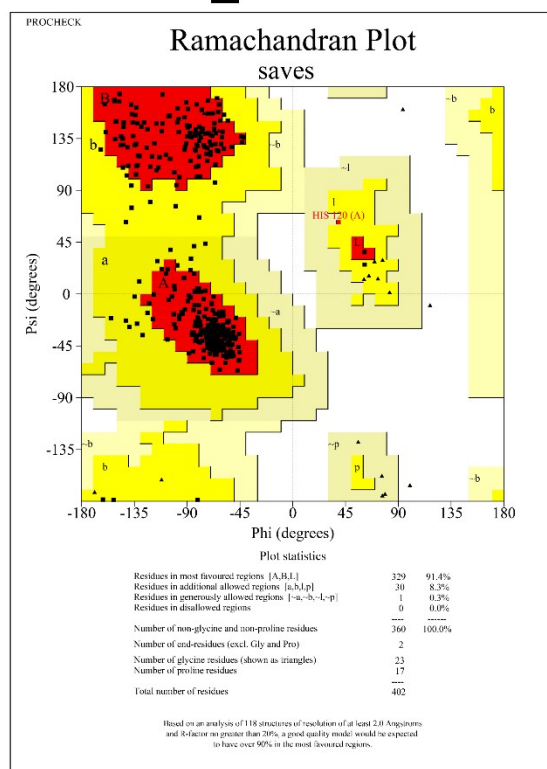

## I63P/H108G

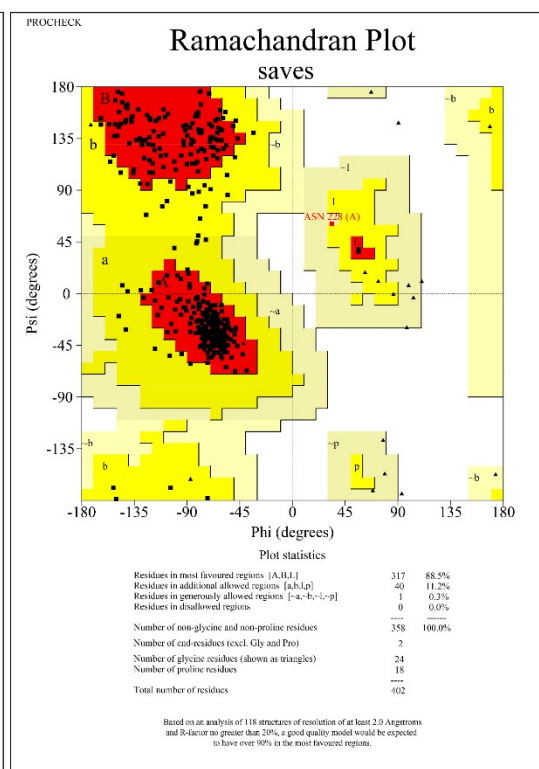

**Figure S15.** The Ramachandran plot assessment. The Ramachandran plot was used for evaluating model qualities of BarGT-3 (WT) and its double-variant (I63P/H108G) constructed by AlphaFold2. No residue of WT and I63P/H108G was in the disallowed region. The parameters of WT and I63P/H108G were marked below.

```

                                H14                                Loop 56-73    I63
BarGT3      1 MA - - NVLVINFPGEHINPTLAIVSEL IQRGETVVSYCIEDYRKKVEATGAEFRVFNFLS - - QINIME 65
YojK_7VM0   1 MA - - NVLMIGFPGEGHINPSIGVMKELKSRGENITYYAVKEYKEKITALDIEFREYHDFRG - - DYFGKN 65
YjiC_7BOV   1 MKKYHISMINIPAYGHVNPPTLALVEKLCEKGRVTYATTEEFAPAVQQAGGEAL IYHTSLNIDPKQIRE 69
                Loop 56-73                                D106 H108
BarGT3      66 RVNEGGSPLT - MLSHMIEASERIVTQIVEETKEEKYDYL IYDNHFPVGR I IANILHLPSVSSCTTFAVN 133
YojK_7VM0   66 ATGDEERDFTEMLCAFLKACKDIATHIYEIVKHESYDYV IYDHLHLLAGKV I ANMLKLPRFSLCTTFAMN 134
YjiC_7BOV   70 MMEKNDAPLS - - - - LLKESLSILPQLEELYKDDQPD I IYDFVALAGKLF AEKLNVPV I KLCSSY AQN 133

BarGT3      134 QYINFHDEQESRQVD - - - EMDPLYQSCLAGMERWNNKQYGMKCNMYD I MNHPGD I TIVYTSKEYQPRSE 199
YojK_7VM0   135 E - - EFAKEMMGAYMKGSL EDSPHYESYQLAETLNADFQAE I KKPFDVFLADGDLT I VFTSRGFQPLAE 201
YjiC_7BOV   134 ESFQLGNEDMLKKIR - - - - EAEAEFKAYL - - - - - EQEKLPAVS - FEQLAVPEALN I VFMPKSFQIQHE 191

BarGT3      200 VFDESYK FVGPS I ATRKEVGSFPTEDL KNEKVI F I SMGTVFNEQPALYEKCFEAFKDVDATVVLVVGKK 268
YojK_7VM0   202 QFGERYV FVGPS I TERAGNDFPFQDI DNENVLFI SMGT I FNNQKQFFNQCLEVCKDFDGKVVLS I GKH 270
YjiC_7BOV   192 TFDDRF C FVGPSLGERKEKESLLIDK - DDRPLML I SLGTAFAWPEFYKMC I KAFRDSSWQV I MSVGKT 259

BarGT3      269 INISQFEN I PKNFKLYNYVPQLEVLQHADV FVTHGGMNSSSEALYYGVPLVVI PVTGDQPFVAKRLTEV 337
YojK_7VM0   271 IKTSELNDIPENF I VRPYVPQLE I LKRASLFVTHGGMNSTSEGLYFETPLVVI PMGGDQFVADQVEKV 339
YjiC_7BOV   260 IDPESLED I PANFT I RQSVLPQLEVLKADLFI SHGGMNSTMEAMNAGVPLVVI PQMYEQELTANRVDEL 328

BarGT3      338 GAGIRLN RNELTSELLREAVKVMDDVTFKENS R KVGESLRNAGGYQRAVEE I - FKLKMKPY - - - VKIK 402
YojK_7VM0   340 GAGKVIKKEELSESLLKET I QEVMNRSYAEKAKE I GQSLKAAGGSKKAADS I LEAVKQKTQSANA ALE 408
YjiC_7BOV   329 GLGVYLPKEEVT VSSLQEA VQAVSSDQELLSRVKNMQKDVKEAGGAERAAA E I - EAFMKKS - - - AVPQ 392

```

**Figure S16.** Multiple sequence alignment (MSA) analysis for BarGT-3. BarGT-3 was conducted MSA with the typical crystal structures of enzymes in GT1 family (YjiC PDB ID: 7BOV<sup>14</sup> and YojK PDB ID: 7VM0<sup>15</sup>).

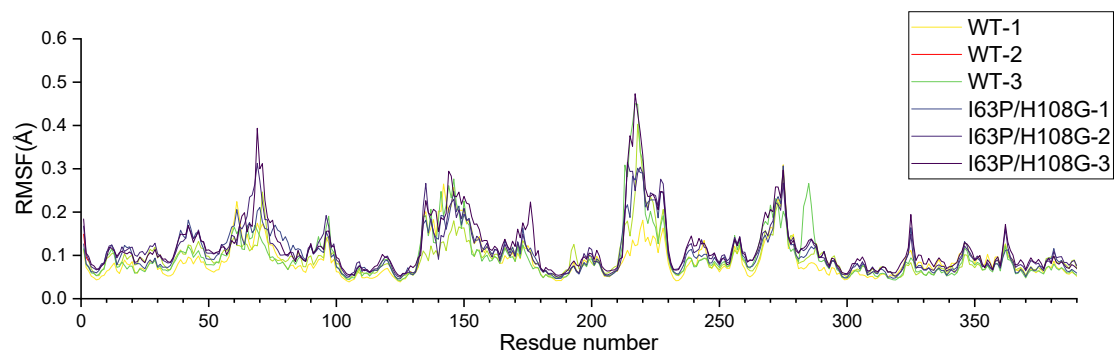

**Figure S17.** The comparison of RMSF values of WT and the double-variant I63P/H108G. Three parallel sets of MD simulations for WT and the double-variant I63P/H108G were performed with 200 ns, respectively.

#### 4. Figures S18-S44. NMR spectrum of glycosylated products 1a-9a.

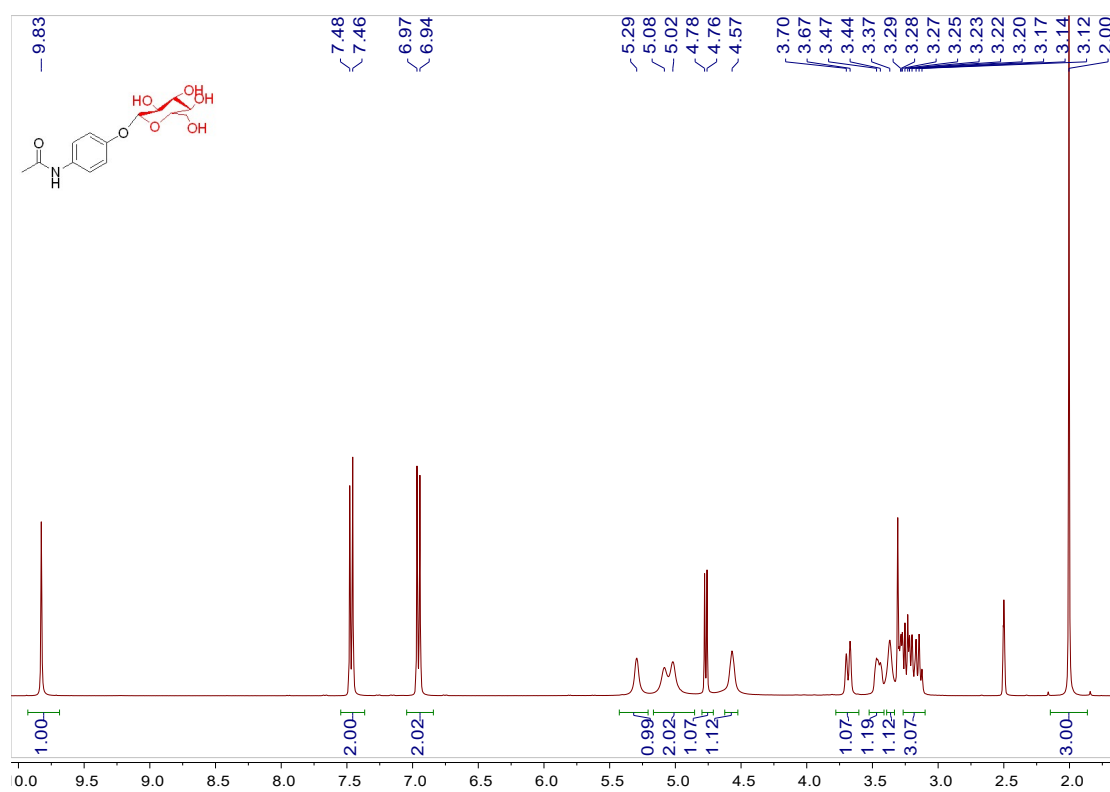

**Figure S18.** <sup>1</sup>H NMR spectrum of compound **1a** (400 MHz, DMSO-d<sub>6</sub>)

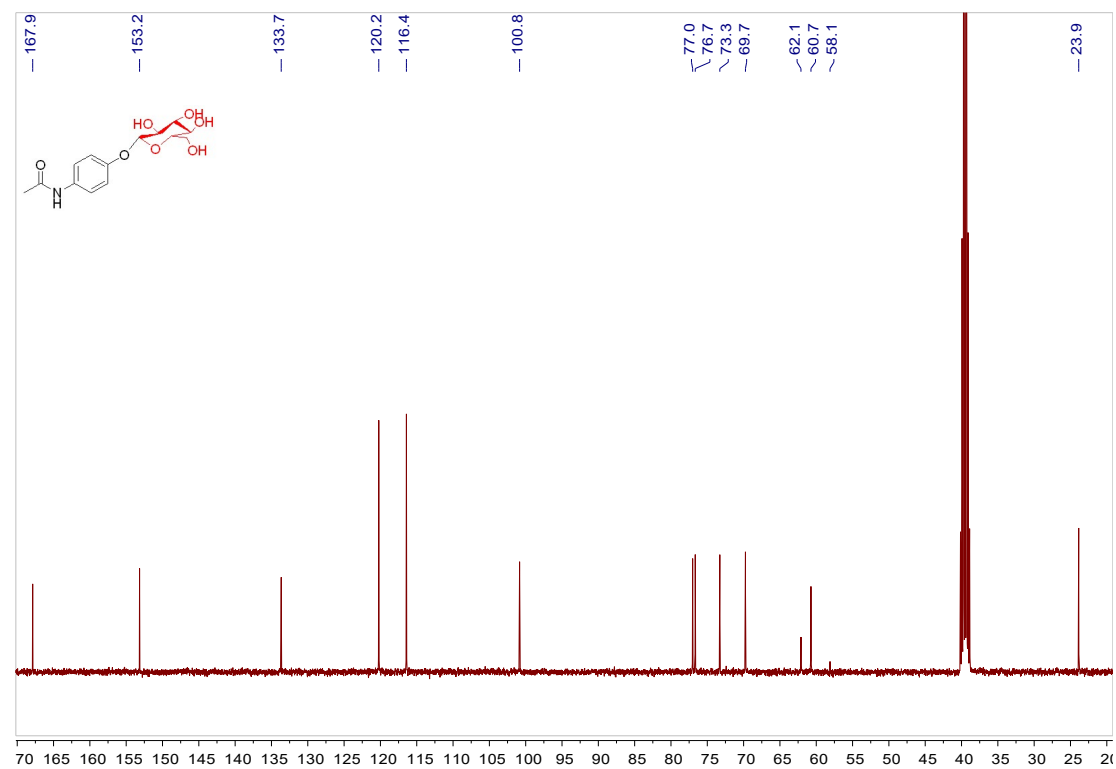

**Figure S19.** <sup>13</sup>C NMR spectrum of compound **1a** (101 MHz, DMSO-d<sub>6</sub>)

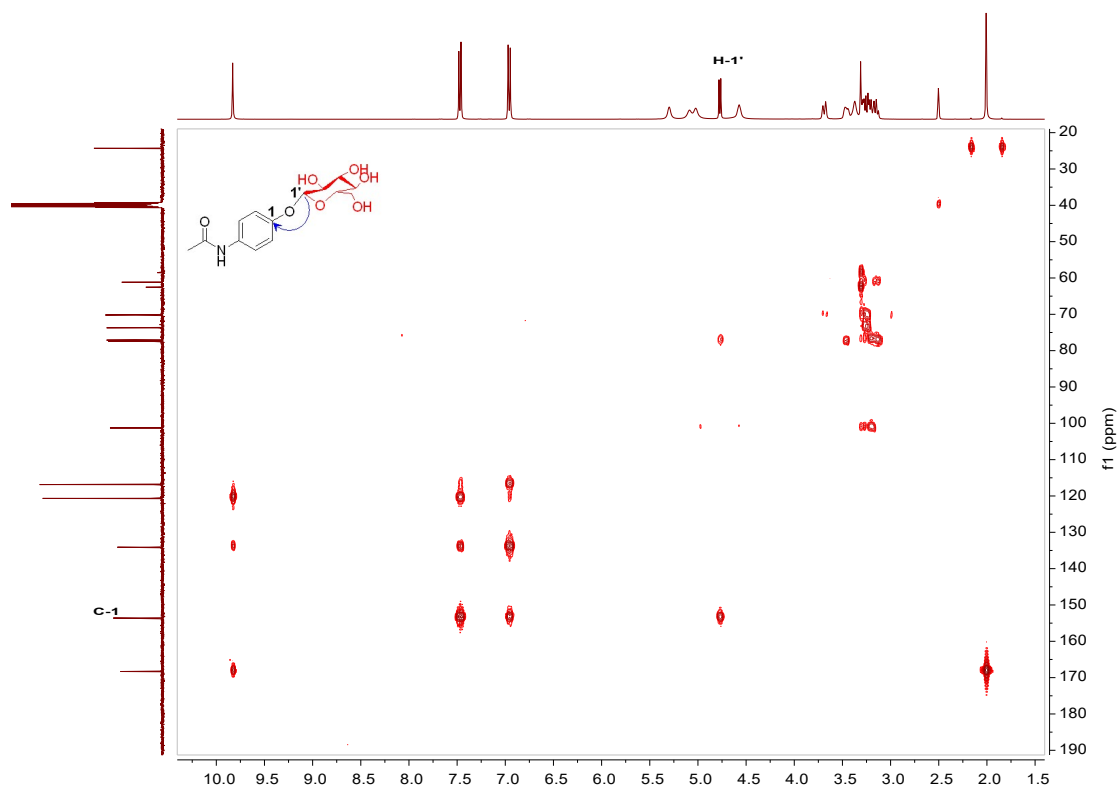

**Figure S20.** HMBC spectrum of compound **1a** (400 MHz/101 MHz, DMSO-d<sub>6</sub>)

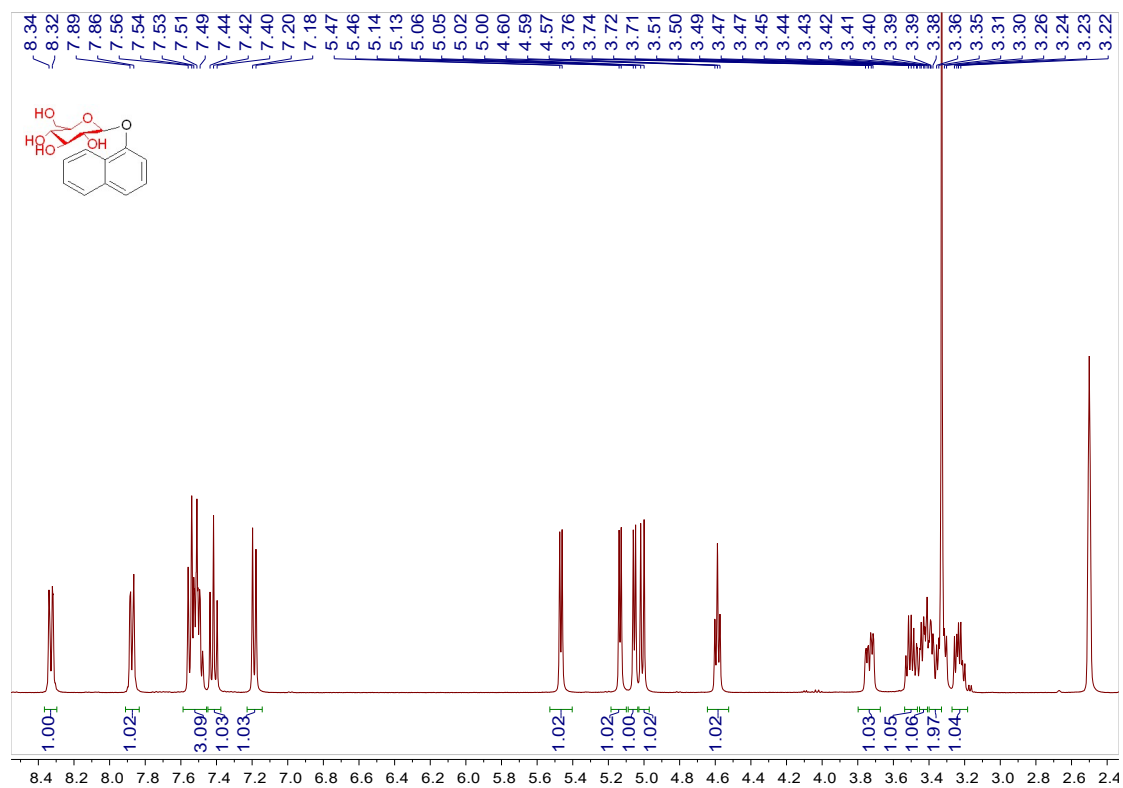

**Figure S21.** <sup>1</sup>H NMR spectrum of compound **2a** (400 MHz, DMSO-d<sub>6</sub>)

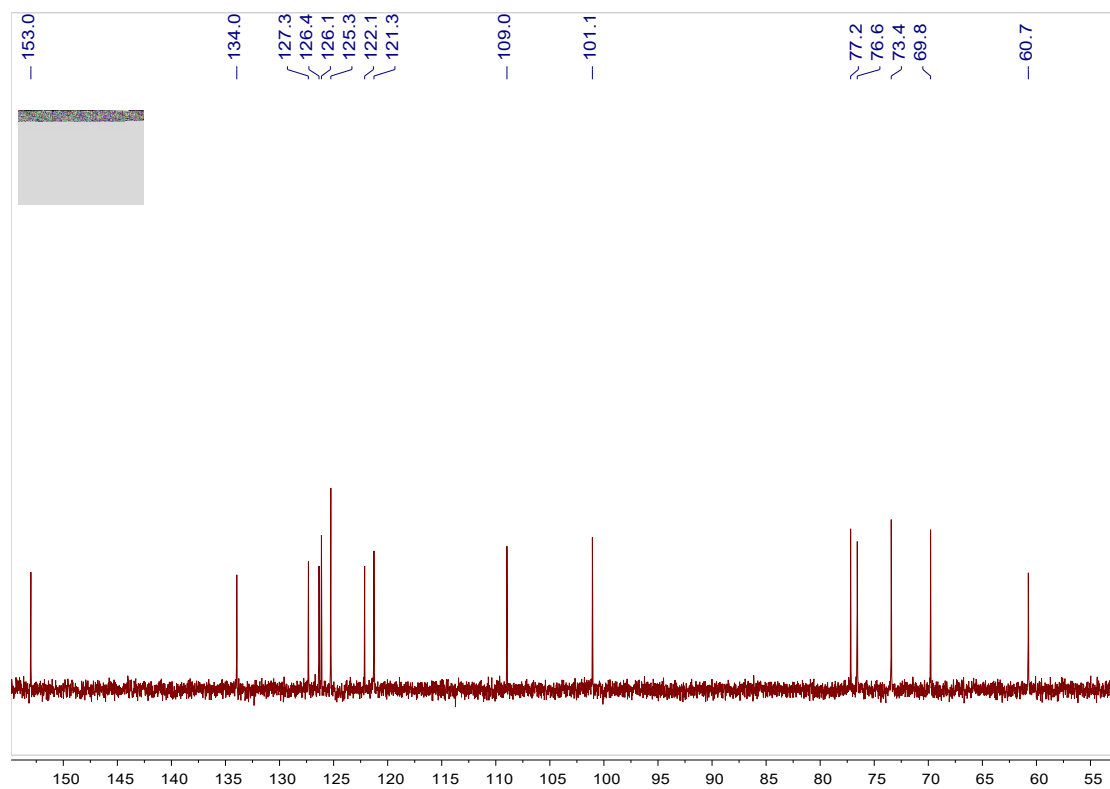

Figure S22.  $^{13}\text{C}$  NMR spectrum of compound **2a** (101 MHz, DMSO- $d_6$ )

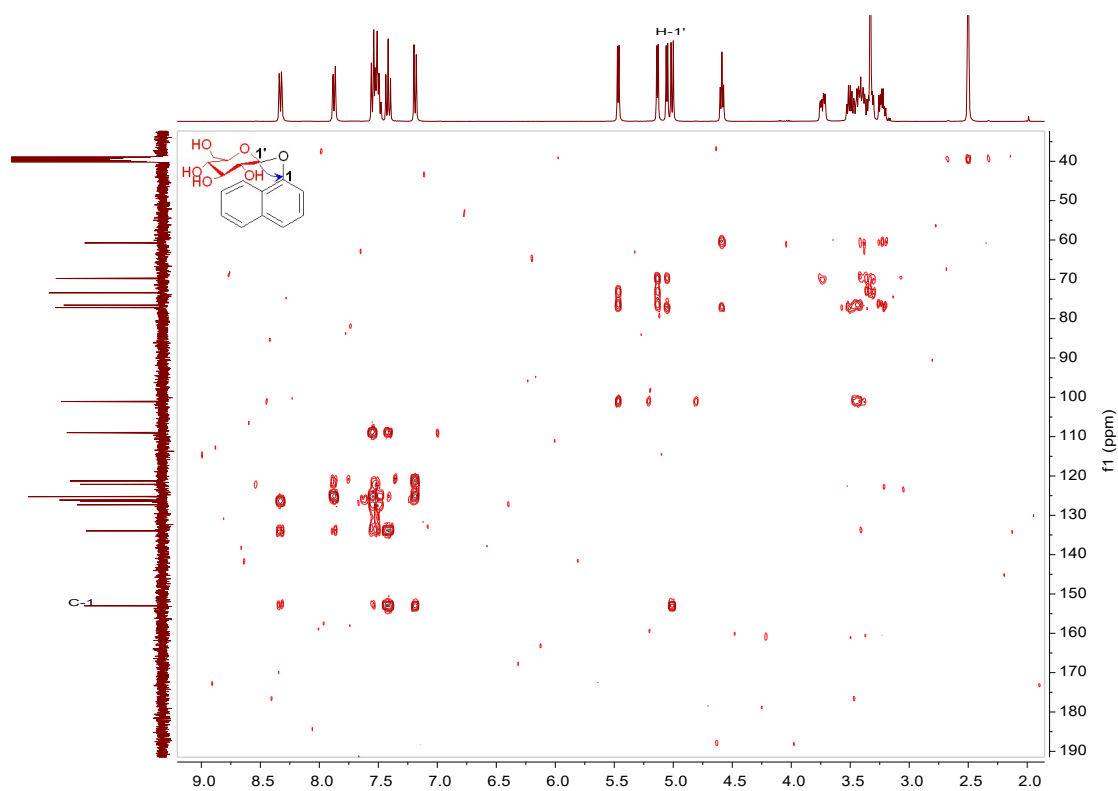

Figure S23. HMBC spectrum of compound **2a** (400 MHz/101 MHz, DMSO- $d_6$ )

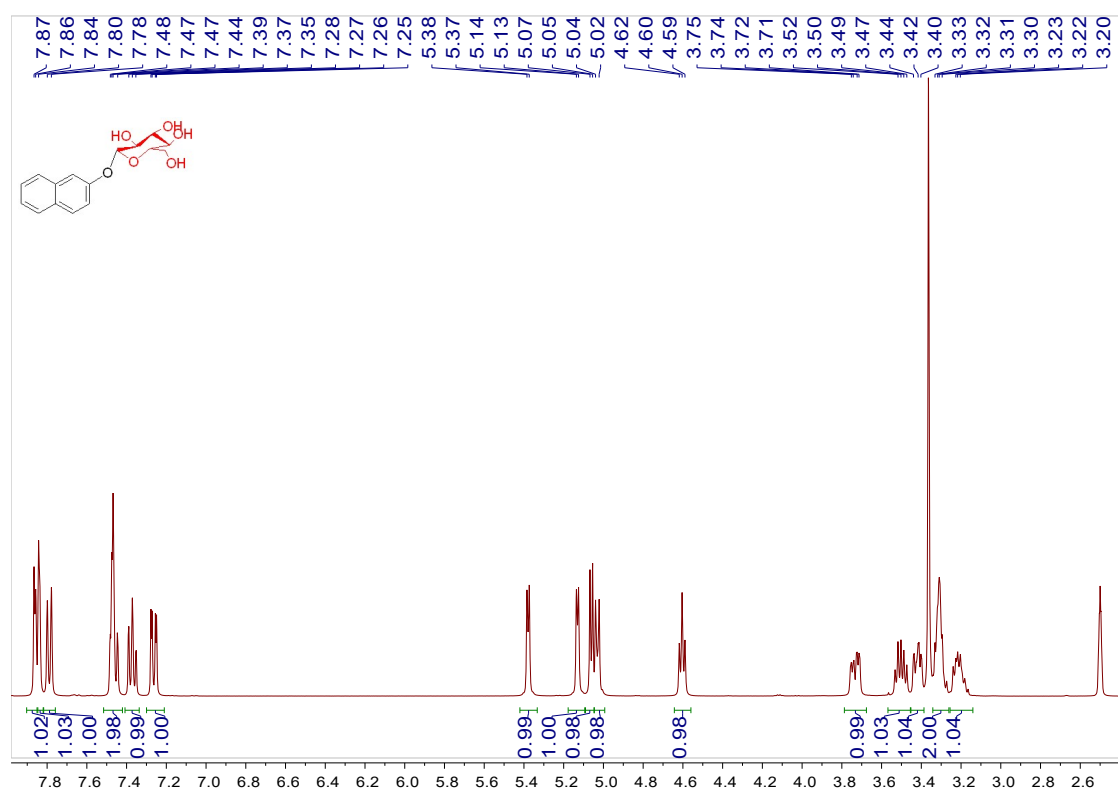

**Figure S24.**  $^1\text{H}$  NMR spectrum of compound **3a** (400 MHz, DMSO- $d_6$ )

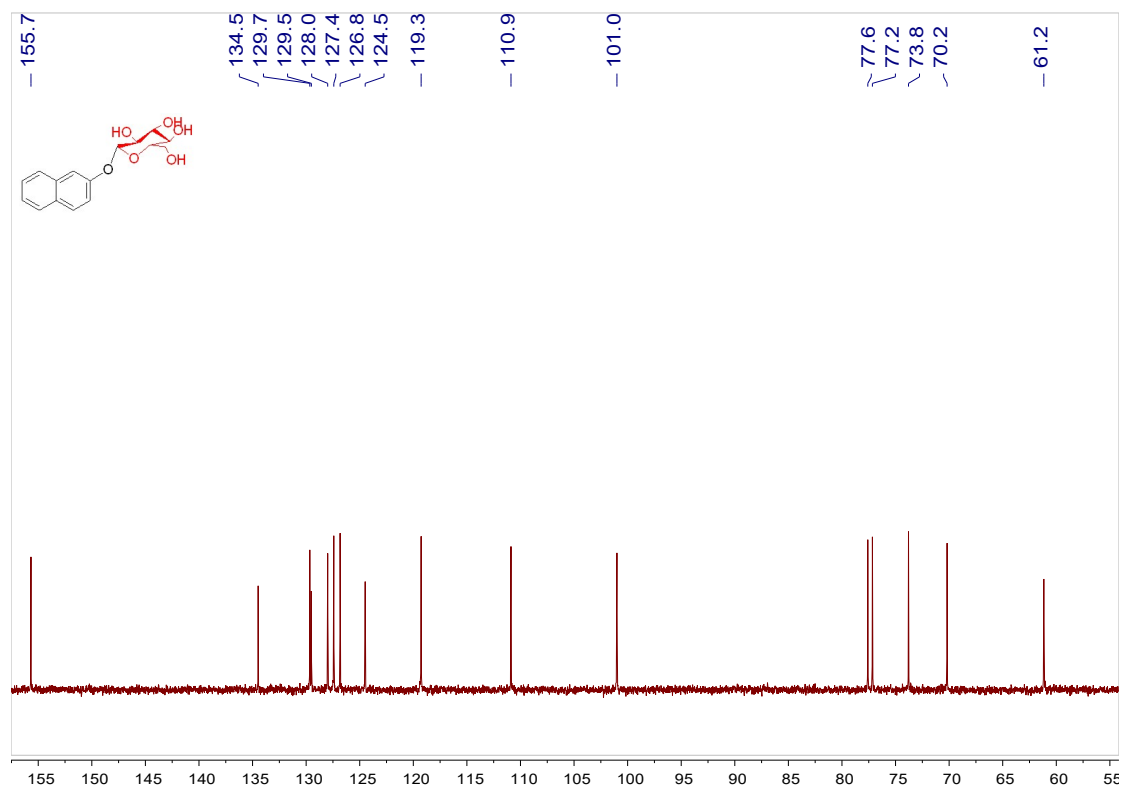

**Figure S25.**  $^{13}\text{C}$  NMR spectrum of compound **3a** (101 MHz, DMSO- $d_6$ )

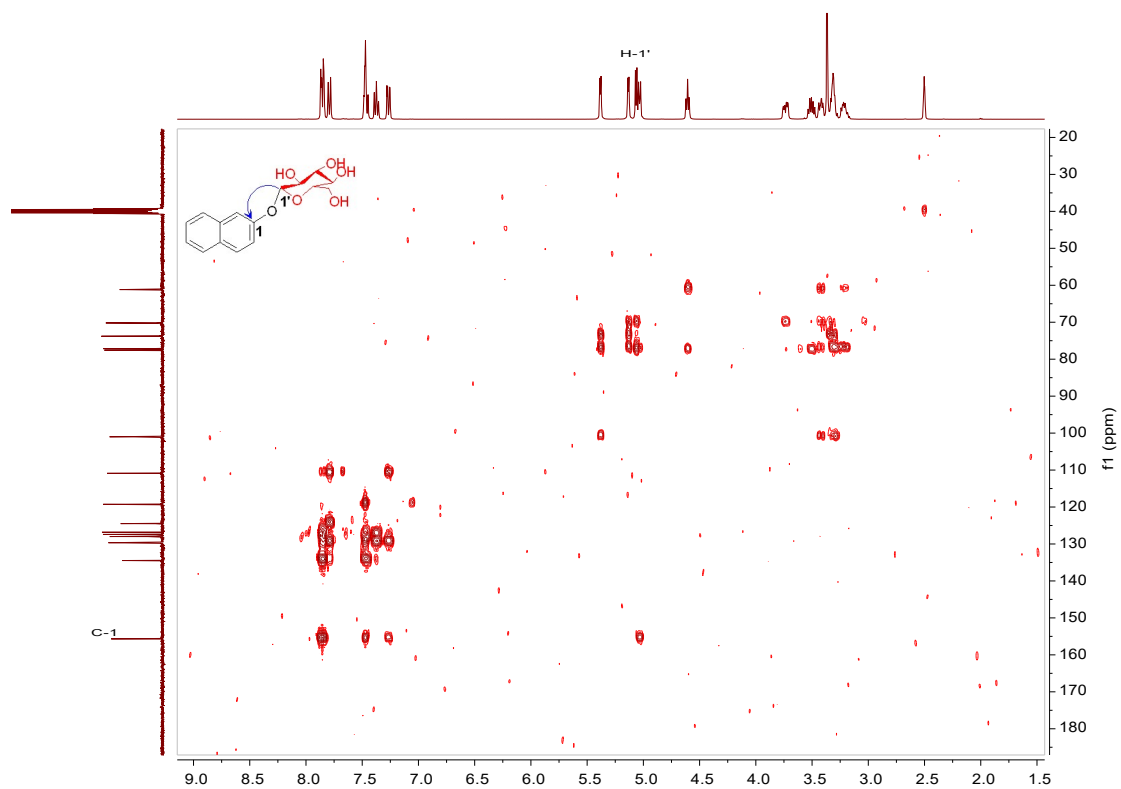

Figure S26. HMBC spectrum of compound **3a** (400 MHz/101 MHz, DMSO-d<sub>6</sub>)

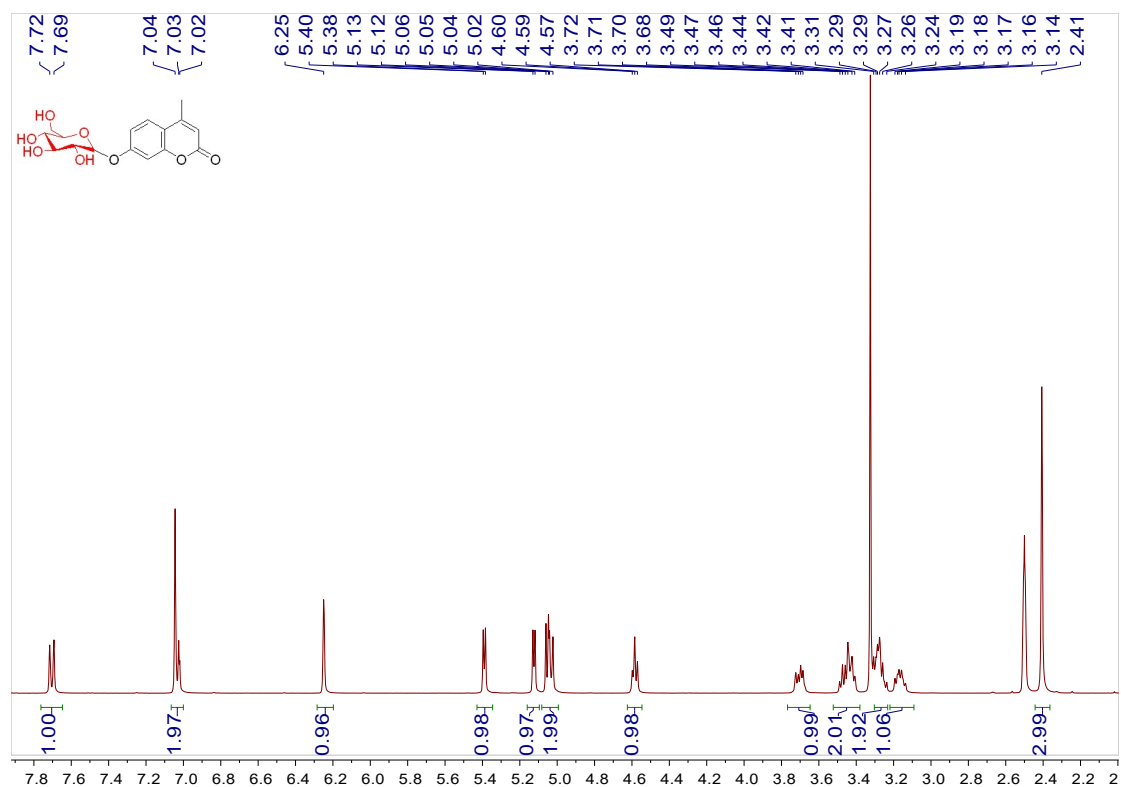

Figure S27. <sup>1</sup>H NMR spectrum of compound **4a** (400 MHz, DMSO-d<sub>6</sub>)



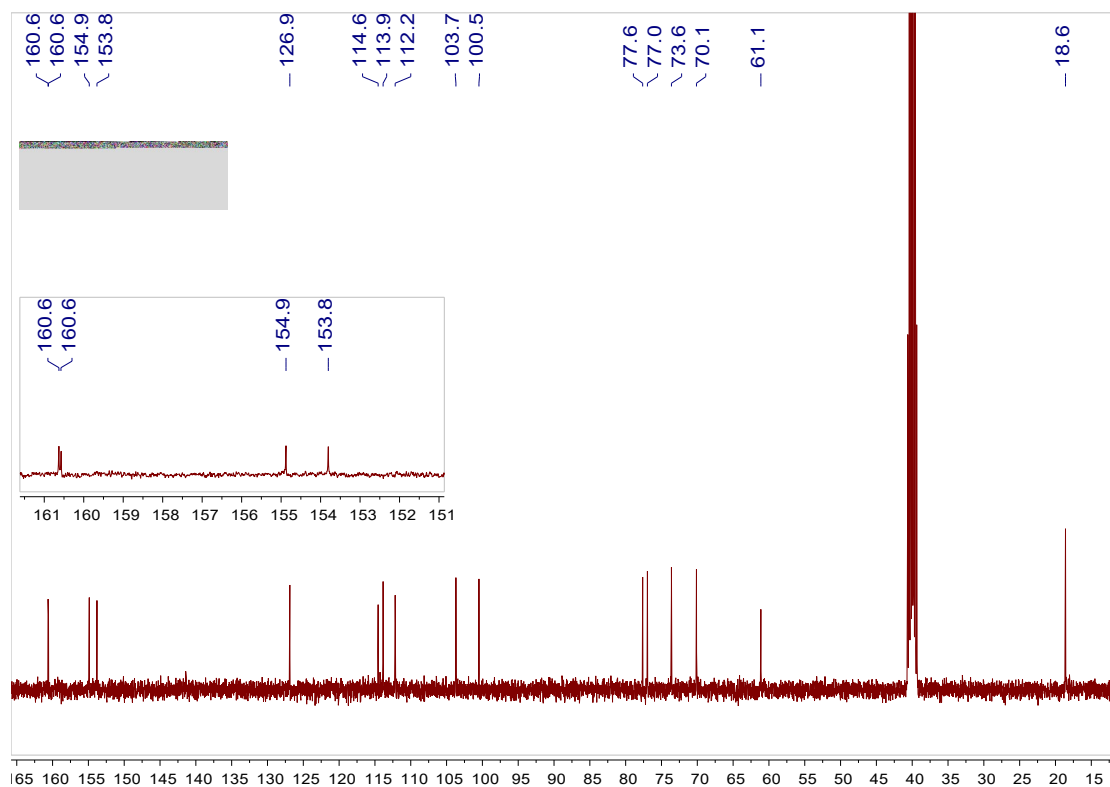

**Figure S28.**  $^{13}\text{C}$  NMR spectrum of compound **4a** (101 MHz, DMSO-d<sub>6</sub>)

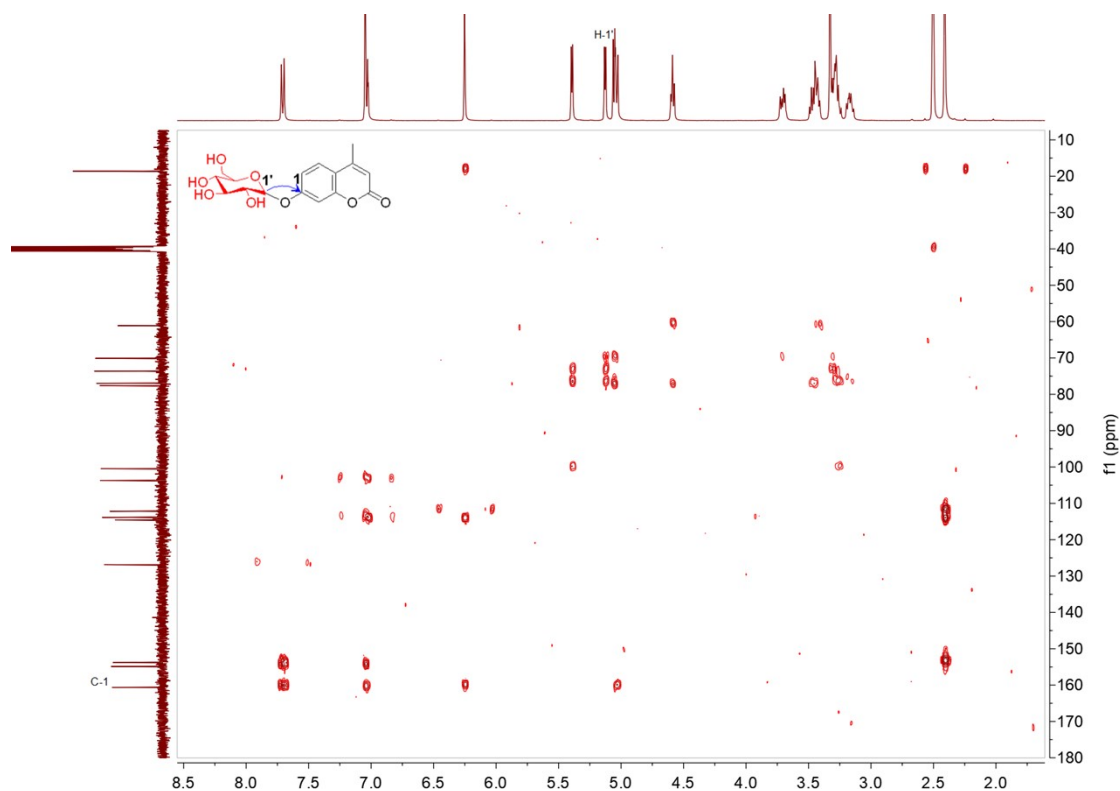

**Figure S29.** HMBC spectrum of compound **4a** (400 MHz/101 MHz, DMSO-d<sub>6</sub>)

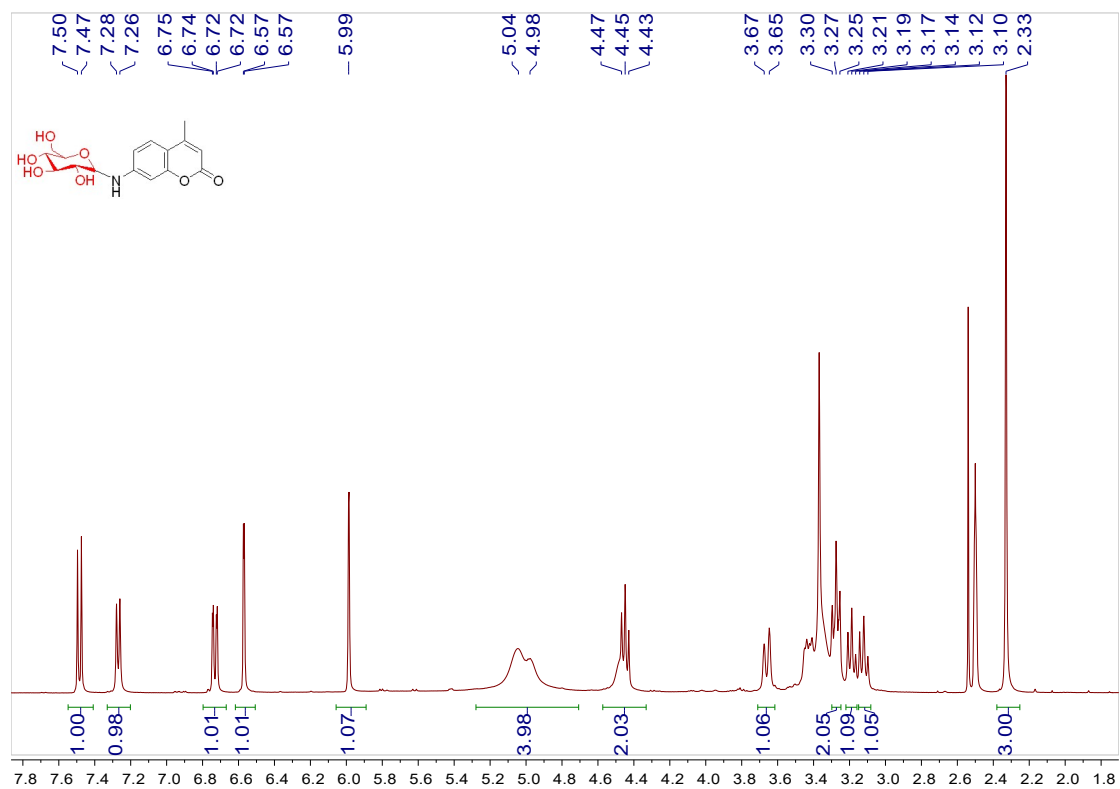

**Figure S30.** <sup>1</sup>H NMR spectrum of compound **5a** (400 MHz, DMSO-d<sub>6</sub>)

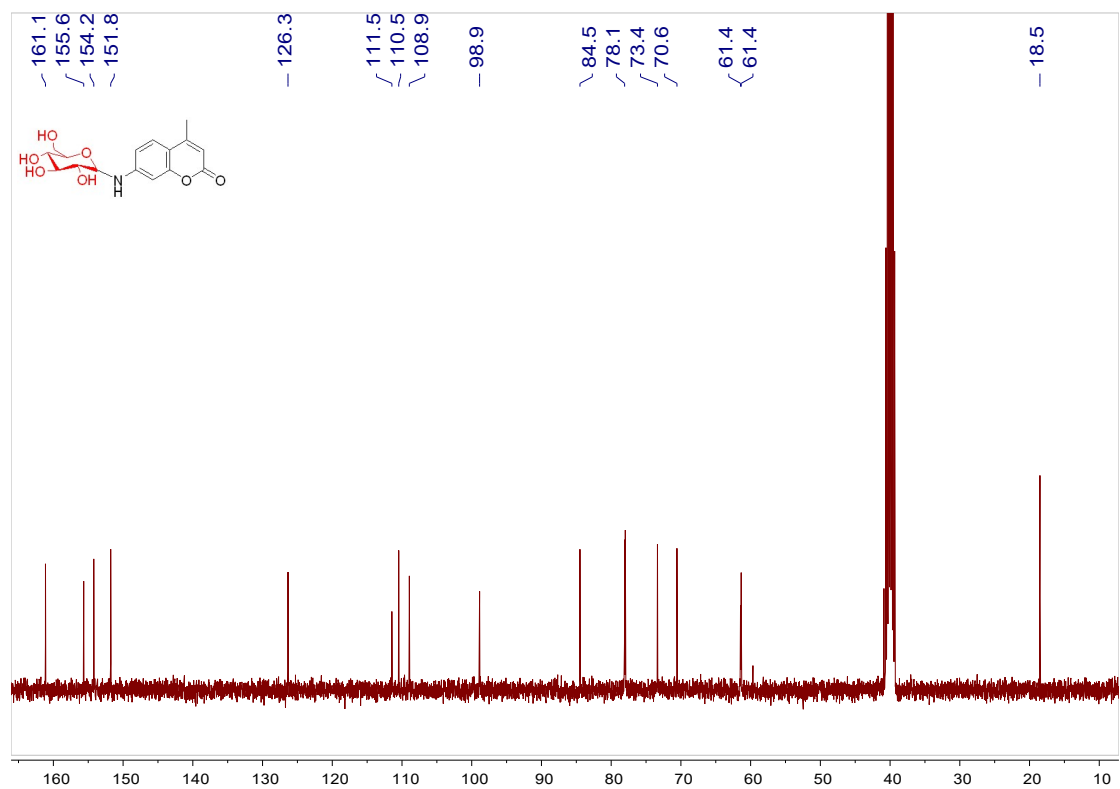

**Figure S31.** <sup>13</sup>C NMR spectrum of compound **5a** (101 MHz, DMSO-d<sub>6</sub>)

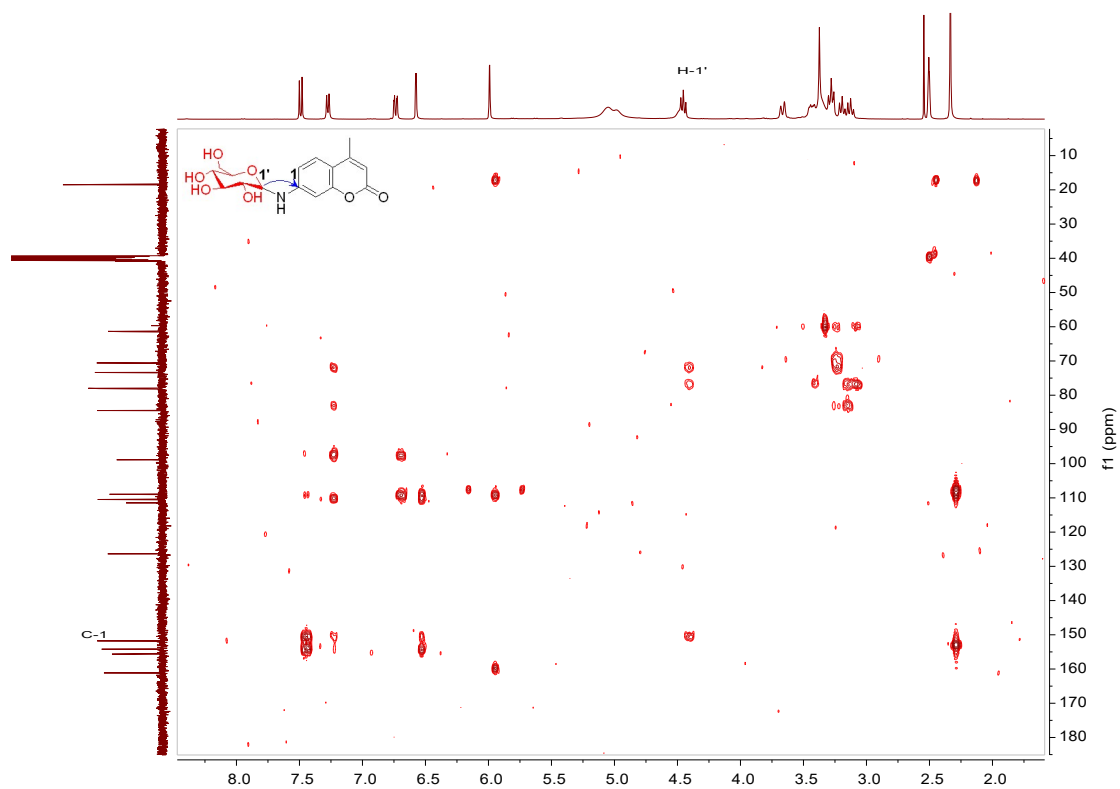

**Figure S32.** HMBC spectrum of compound **5a** (400 MHz/101 MHz, DMSO-d<sub>6</sub>)

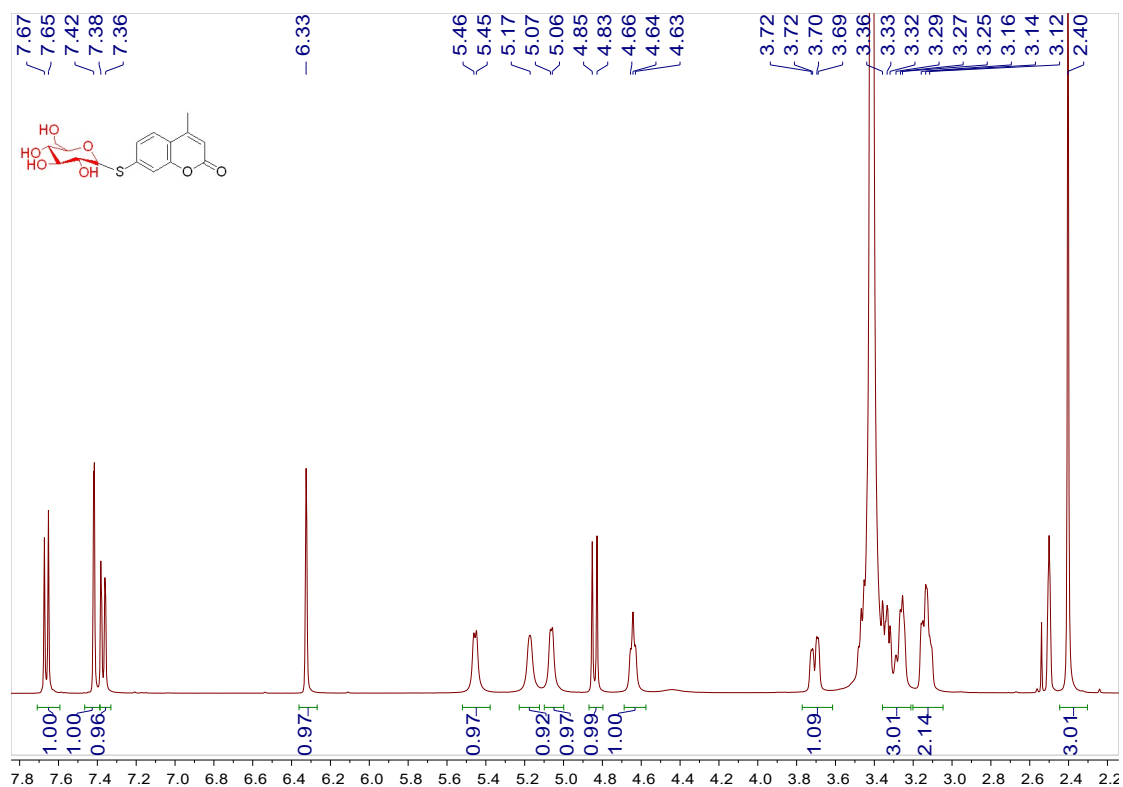

**Figure S33.** <sup>1</sup>H NMR spectrum of compound **6a** (400 MHz, DMSO-d<sub>6</sub>)

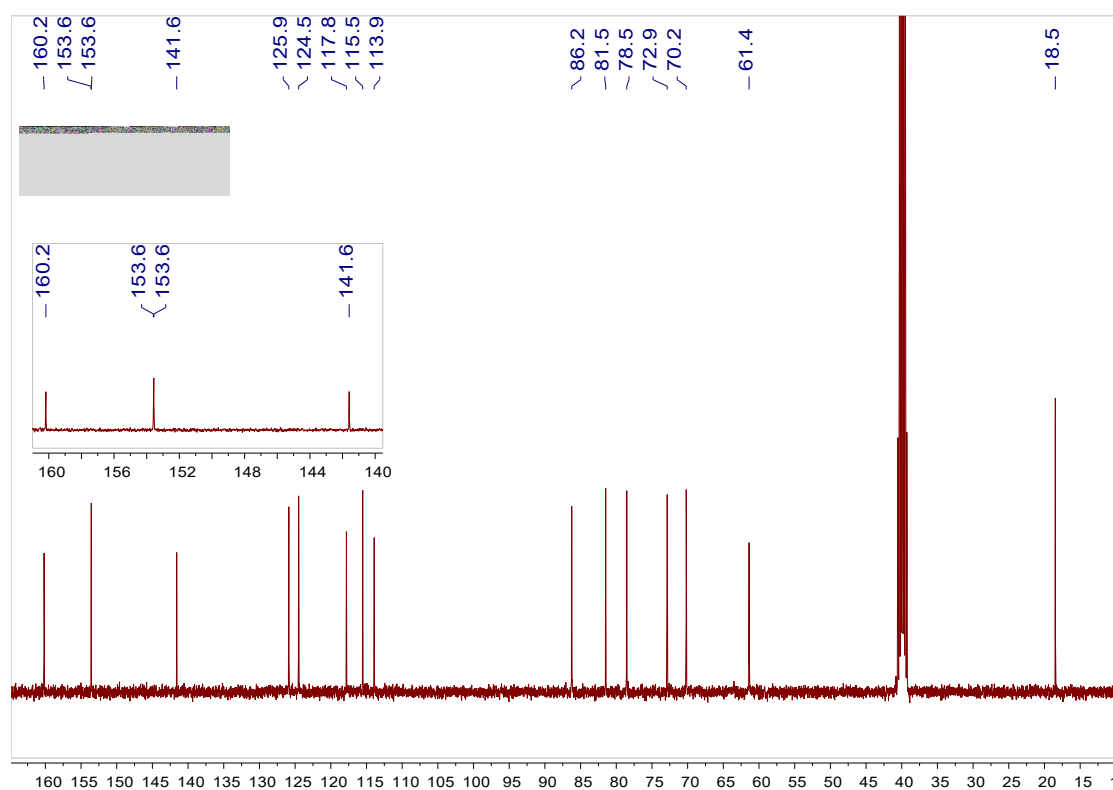

Figure S34.  $^{13}\text{C}$  NMR spectrum of compound **6a** (101 MHz, DMSO-d<sub>6</sub>)

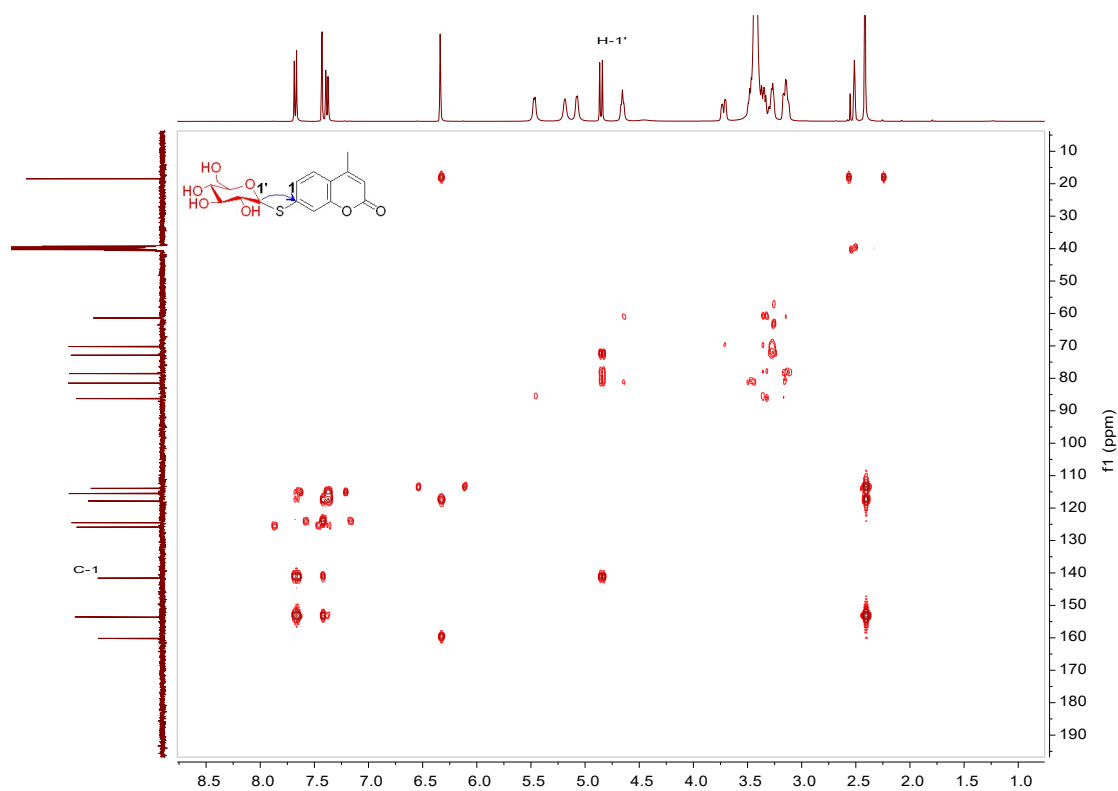

Figure S35. HMBC spectrum of compound **6a** (400 MHz/101 MHz, DMSO-d<sub>6</sub>)

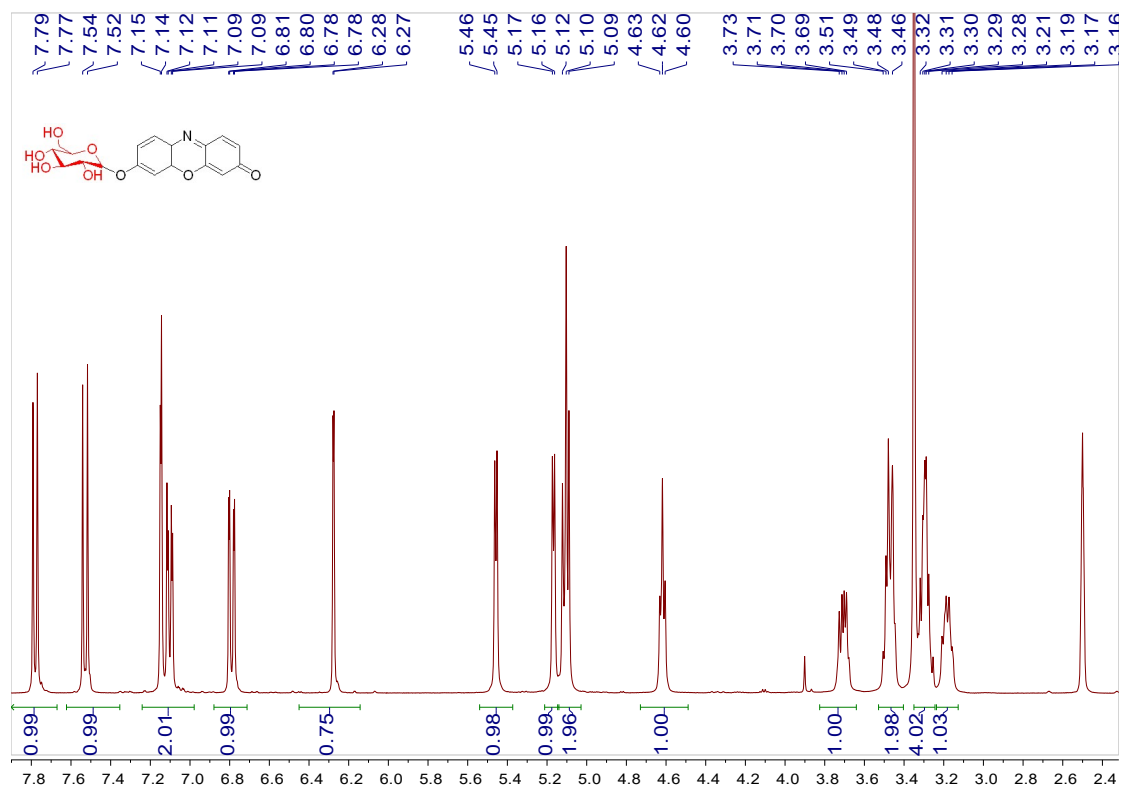

**Figure S36.** <sup>1</sup>H NMR spectrum of compound **7a** (400 MHz, DMSO-d<sub>6</sub>)

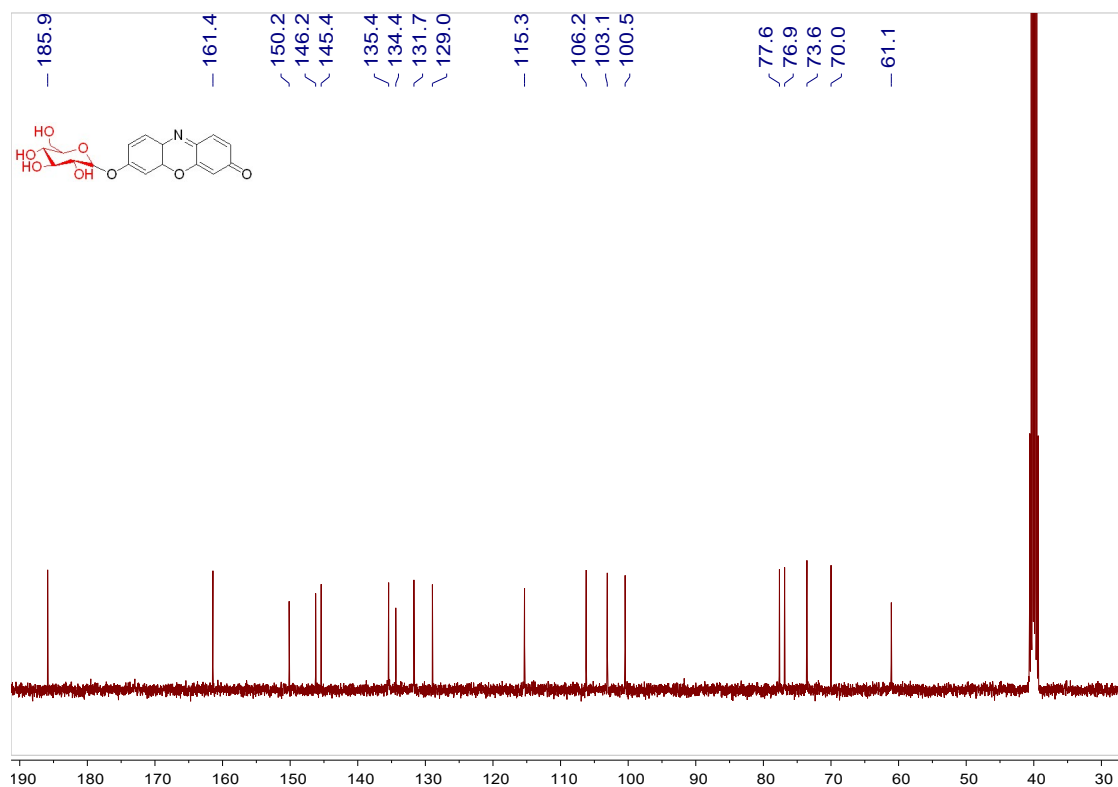

**Figure S37.** <sup>13</sup>C NMR spectrum of compound **7a** (101 MHz, DMSO-d<sub>6</sub>)

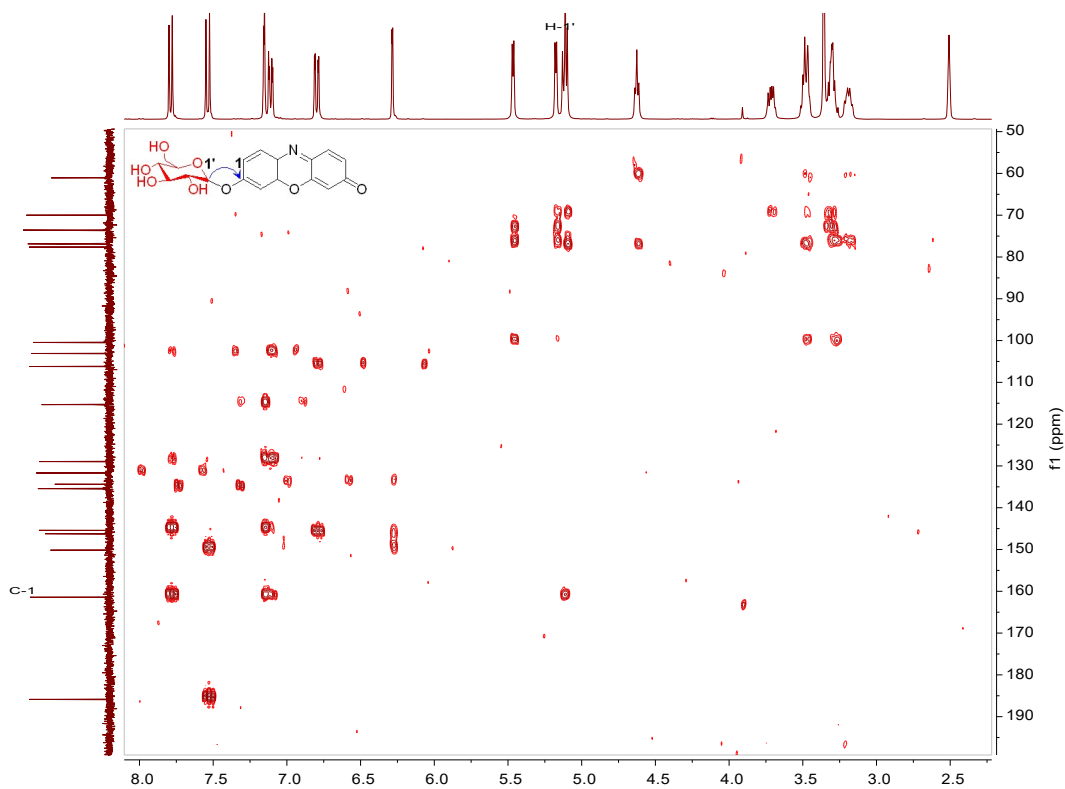

Figure S38. HMBC spectrum of compound 7a (400 MHz/101 MHz, DMSO-d<sub>6</sub>)

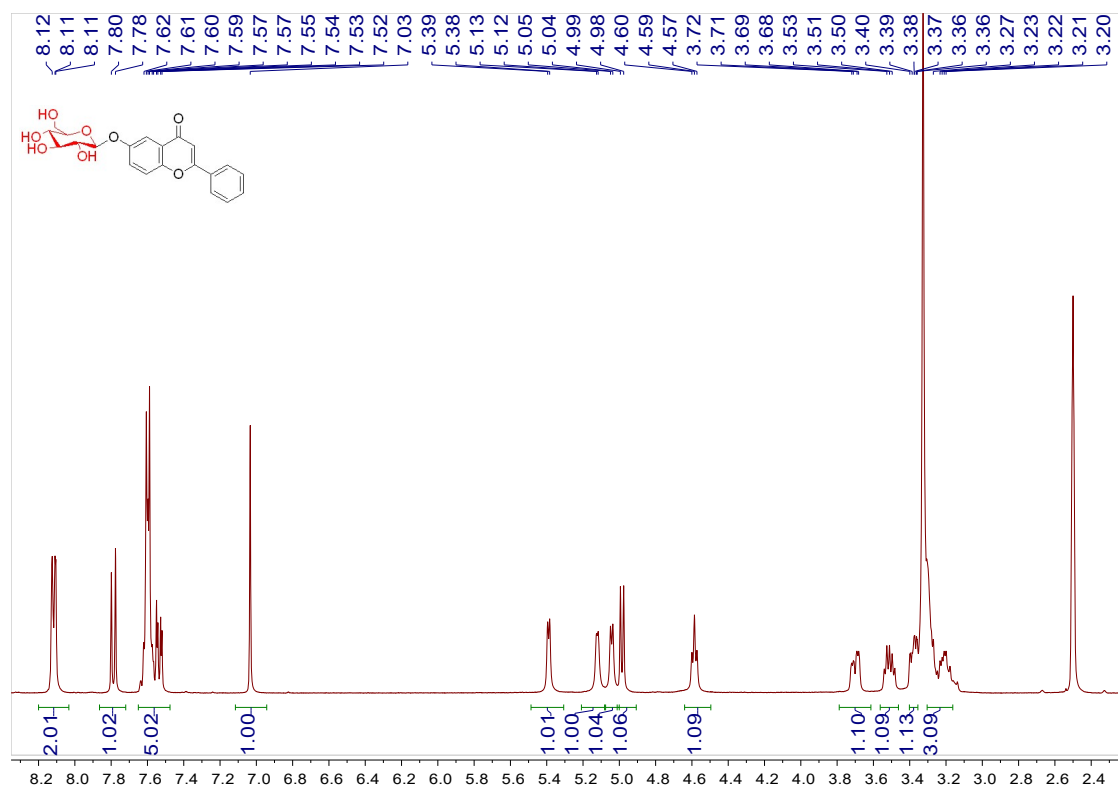

Figure S39. <sup>1</sup>H NMR spectrum of compound 8a (400 MHz, DMSO-d<sub>6</sub>)

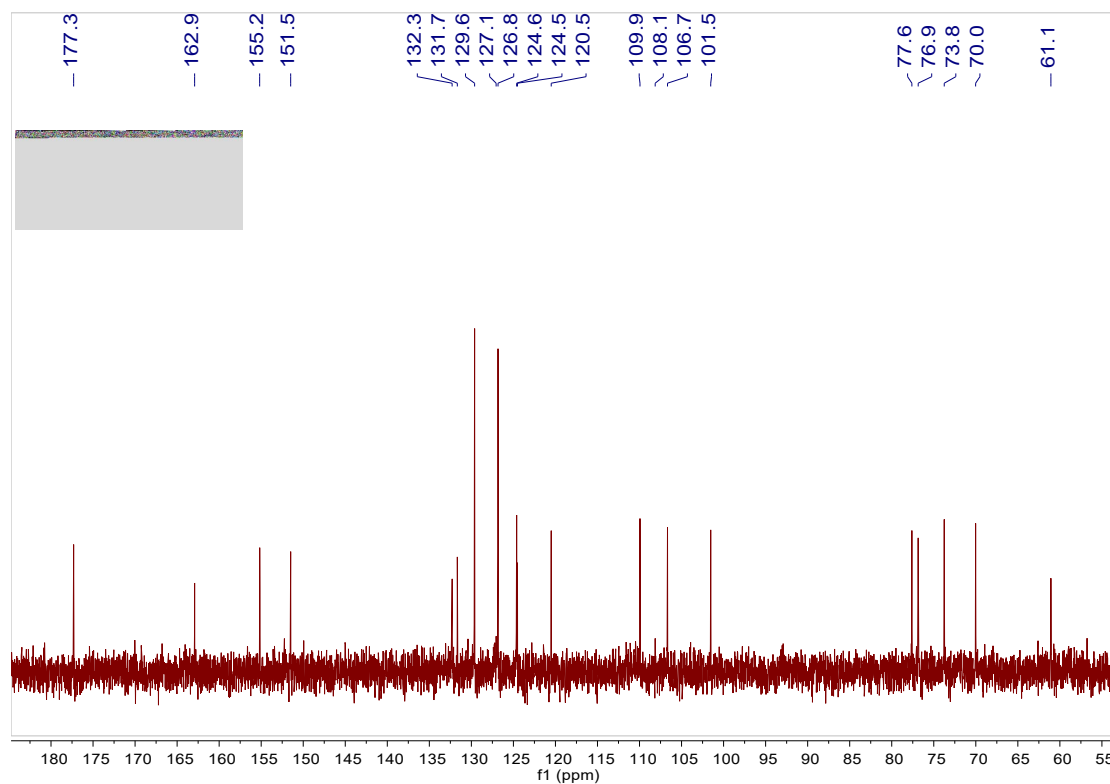

Figure S40.  $^{13}\text{C}$  NMR spectrum of compound **8a** (101 MHz, DMSO-d6)

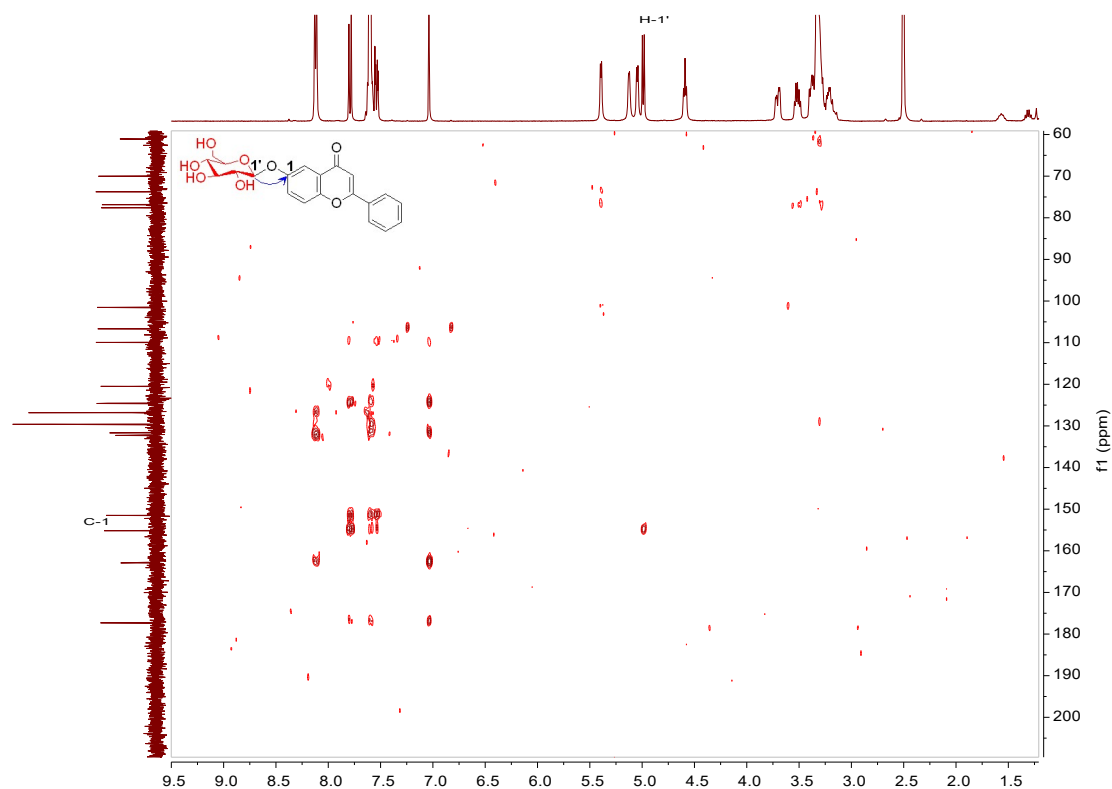

Figure S41. HMBC spectrum of compound **8a** (400 MHz/101 MHz, DMSO-d6)

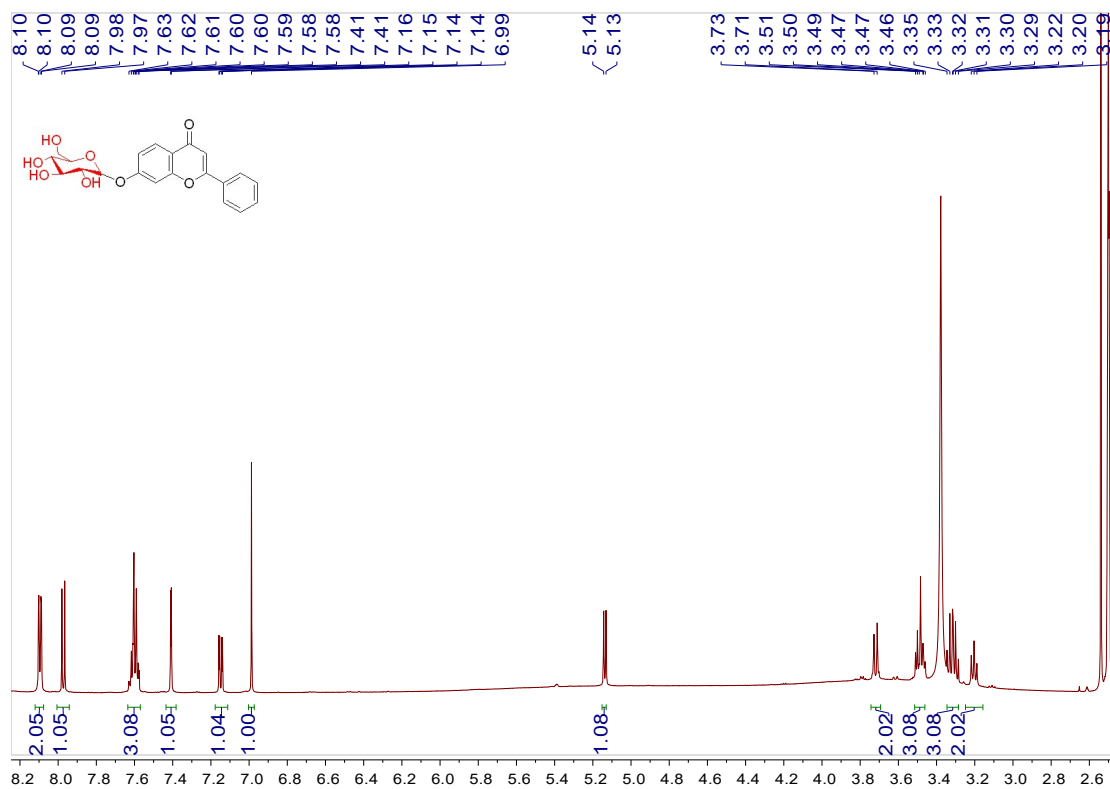

**Figure S42.**  $^1\text{H}$  NMR spectrum of compound **9a** (400 MHz, DMSO- $d_6$ )

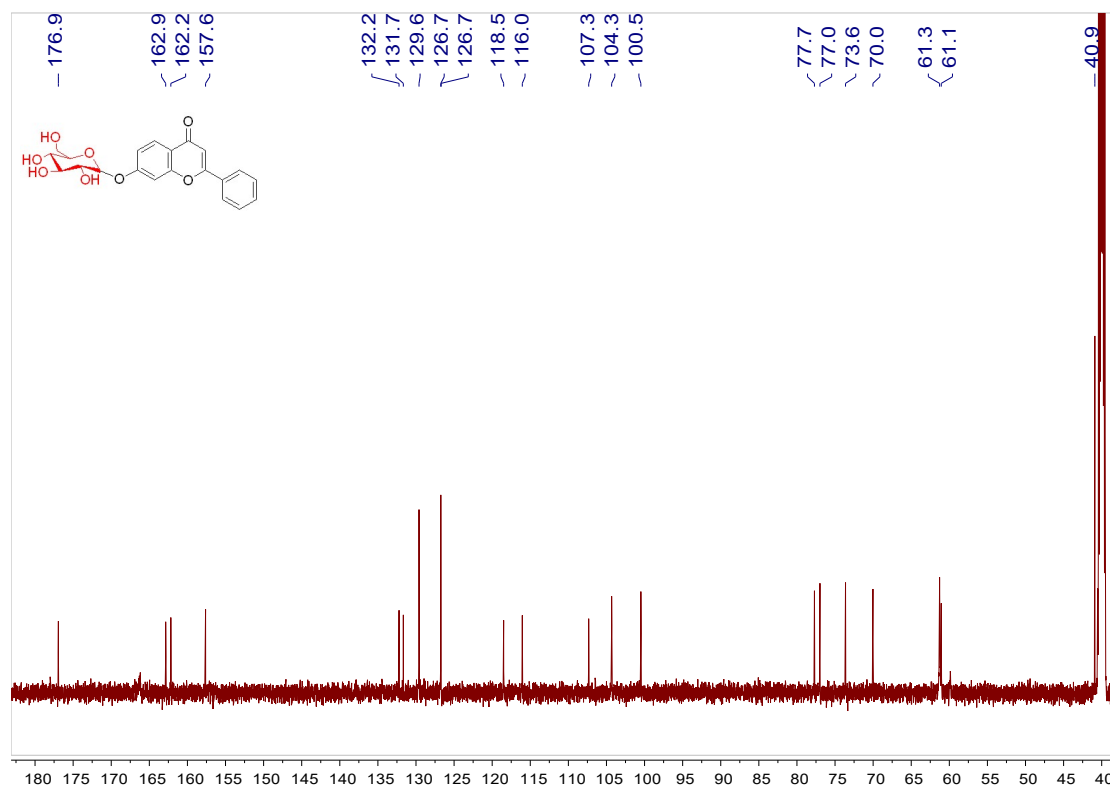

**Figure S43.**  $^{13}\text{C}$  NMR spectrum of compound **9a** (101 MHz, DMSO- $d_6$ )



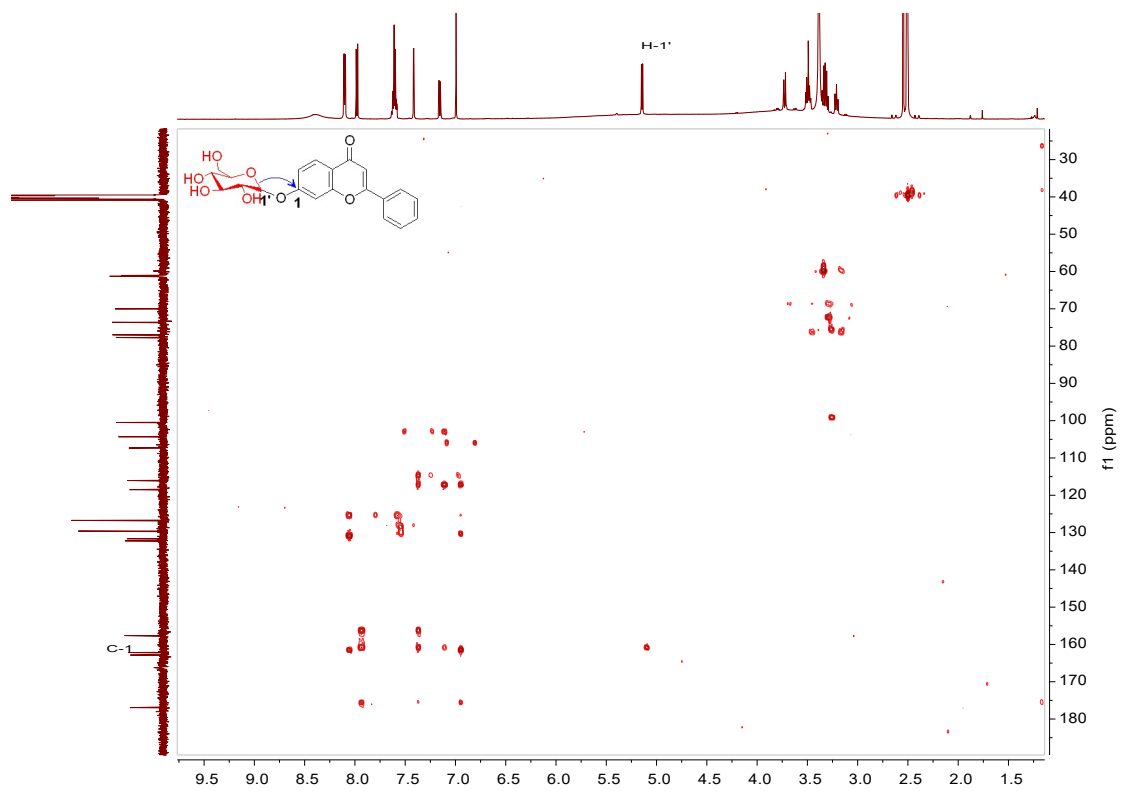

**Figure S44.** HMBC spectrum of compound **9a** (400 MHz/101 MHz, DMSO-d<sub>6</sub>)

## 5. The DNA and protein sequences of BarGT-1, -2, and -3.

### >BarGT-1 (DNA sequence)

ATGCTGAACATTCTGGTGGTGAACTTTCCGGCGGAAGGCCATGTGAACC  
CGACCCTGAACCTGGTGAAAGCGTTTACCAAACGCGGGCGATAACGTGCA  
TTATATTACCACCGCGAACTTTAAAGATCGCATTGAAGATCTGGGCGCGA  
CCGTGCATATTCATCCGGATCTGCTGAAGGAAATTAGCATTGATGCGGA  
AACGAGCAGCGGCCTGAACGCGTTTTTTTCATGTGCATGTGCAGACGAGC  
CTGTATATTCTGGAAATTACCAAACAGCTGTGCGAAAGCATTAACTTTGA  
TTTTGTGATTTATGATATTTTTGGCGCGGGCGAACTGGTGAAAGAATATC  
TGCAAGTGCCGGGCGTGGTGAGCAGCCCGATTTTTCTGATTCCGCCGG  
AATTTCTGAAAACCCTGCCGTTTCATCCGAACGCGGATATGCCGTTTCAG  
CCGGAAGAAATTAGCGAAAACTGCTGAATCAGATGGAACATAAATTTGG  
CGTGAAACCGAAAAACAACCTGCAGTTTATGAACAACAAGGCGATGTG  
TGCCTGGTGTATACGAGCCGCTATTTTCAGCCGAACAACGAGAGCTTTG  
GCGAAAACAACATTTTTATTGGCCCGAGCATTAGCAAACGCAAAACCAAC  
ATTAATTTCCGCTGGAAAGCCTGAAAGAAAAAAAAGTGATTTATATTAGC  
ATGGGCACCCTGCTGGAAGGCCTGGAACCGTTTTTTAACACCTGCATTG  
ATACCTTTAGCGATTTTGATGGCATTGTGGTGATGGCGATTGGCGATCG  
CAACGATATTAGCAAAATTA AAAAAGCGCCGGATAACTTTATTATTGCGC  
CGTATGTGCCGCAGAGCGAAATTCTGAACGAAGCGGATGTGTTTATTAC  
CCATGGCGGCATGAACAGCGTGCATGATGCGATTATTATAACGTGCCG  
TTTGTGATTATTCCGCATGATAAAGATCAGCCGATGATTGCGCAGCGCCT  
GACCGAACTGGAAGCGGCGCATCGCCTGCTGAAAGAACATGTGAACGT  
GCATACCCTGAAAGAAGCGGTGACCGATGTGCTGAGCAACGAAAAATAT  
AACATGGCATTTCGCAAACCTGAACGATAGCTTTCTGGAATGCGGGCGGCA  
GCAAAGAAGCGATTGCGGTGATTGAAAGCCTGCTGAACAAAGTGAAACT  
GTAA

### >BarGT-1 (Protein sequence)

MLNILVVNFPAEGHVNPTLNLVKAFTKRGDENVHYITTANFKDRIEDLGATVHI  
HPDLLKEISIDAETSSGLNAFFHVHVQTSLYILEITKQLCESINFDFVIYDIFGA  
GELVKEYLQVPGVVSSPIFLIPPEFLKTLPFHPNADMPFQPEEISEKLLNQME  
HKFGVKPKNNLQFMNNKGDVCLVYTSRYFQPNNESFGENNIFIGPSISKRKT  
NIKFPLESLKEKKVIYISMGTLLGLEPFFNTCIDTFSDFDGIVVMAIGDRNDIS  
KIKKAPDNFIIAPYVPQSEILNEADVFIHGGMNSVHDAIHYNVPFVIIPHDKDQ  
PMIAQRLTELEAAHRLLEKHNHHTLKEAVTDVLSNEKYKHGIRKLNDSFLEC  
GGSKEAIAVIESLLNKVKL

**>BarGT-2 (DNA sequence)**

ATGGCGCGCGTGCTGTTTATTAACGCGGGCAGCGAAGGCCATATTAACC  
CGACCCTGCAAGTGGTGGGAAGAAGCTGATTAGCCGCGGCGAAGAAATTGT  
GTATTTTAGCATTGAAGCGTTTCGCGAACGCATTGAAAAACCGGCGCG  
ACCGTGCGCACCATTGATGATCAGAAATTTATTAAGCGTTTCTGAGCGG  
CGGCCGCAACTATCTGCAAGAACGCATTAACGGCCTGCTGCATACCGCG  
GATATTGTGATTCCGAGCGTGCTGGAACAGATTGAAGGCGAACATTTTG  
ATTATATTATTCATGATAGCATGTTTGGCTGCGGCCATCTGATTGCGCAG  
ATTCTGAAACTGCCGGCGATTAACAGCTGCACGAGCTTTGCGCAAGATG  
AAAAGAGCTTTGAACAGATGCTGGGCCATCTGAGCAAAAACATTAGCGT  
GGAAATTTATGATAAAATTCAGAACGATTTTCAGAACCTGACCAAAGGCA  
TTGCGGAAAAATATGGCGTGGAAATTAAGCAGCTATGAAGTGTTTTGC  
AACCCGGCGCCGCTGACCATTGTGTATAACATTAAGAATTTTCAGCCGTT  
TGCGGATACCTTTGATGAAACCTATAAATTTGTGGGCCCGAGCATTAGCG  
CGCAGATGAAAAACCGCGATGTGGATTTTACGAGCATTGAAGAAAAAAG  
CCCGATTTATATTAGCCTGGGCACCGTGTTTAACGAAGCGATTGATTTTT  
ATAAACTGTGCATGAAAGCGTTTGAAAACAGCGAACATAACCATTGTGATG  
AGCATTGGCAGCAAAACCAAATTAGCGATCTGGGCGAAATTCCGAAAA  
ACTTTATTGTGAAAACTATGTGCCGCAGACCGAACTGCTGACCTATACC  
AACTGTTTATTACCCATGGCGGCATGAACAGCGCGCATGAAGGCCTGT  
ATAACGGCATTCCGCTGGTGGTATTCCGCAGAGCGCGGATCAGCCGG  
TGGTGGCGAAACAAGTGGAAAGCCTGGGCGCGGGCATTAACTGCAGA  
TGCAAGGCCTGACCGCGGATCAGCTGAGCGAAAGCGTGGAATGGTGC  
TGAACAACCCGAGCTTTAAAGAAGTGGCGCTGAACCTGAAAAAGAGCTT  
TCAGAAAAGCGGCGGCTATAAAGAAGCGGTGGATGAAATTTTTATTTTG  
TGGGTCAGTAA

**>BarGT-2 (Protein sequence)**

MARVLFINAGSEGHINPTLQVVEELISRGEIVYFSIEAFRERIEKTGATVRTID  
DQKFIKAFLSGGRNYLQERINGLLHTADIVIPSVLEQIEGEHFDYIIHDSMFGC  
GHLIAQILKLPAINSCSFAQDEKSFEQMLGHLSKNISVEIYDKIQNDFQNLTK  
GIAEKYGVKSSYEVCNPAPLTIYTIKEFQPFQDFTDETYKFGVPSISAQM  
KNRDVDFTSIEEKSPIYISLGTVFNEAIDFYKLCMKAFENSEHTIVMSIGSKTKI  
SDLGEIPKNFIVKNYVPQTELLTYTKLFITHGGMNSAHEGLYNGIPLVVIPQSA  
DQPVVAKQVESLGAGIKLQMQGLTADQLSESVEMVLNNPSFKEVALNLKKS  
FKKSGGYKEAVDEIFIFVGQ

**>BarGT-3 (DNA sequence)**

ATGGCGAACGTGCTGGTGATTAAC TTTCCGGGCGAAGGCCATATTAACC  
CGACCCTGGCGATTGTGAGCGAACTGATTCAGCGCGGCGAAACCGTGG  
TGAGCTATTGCATTGAAGATTATCGCAAAAAAGTGGAAGCGACCGGCGC  
GGAATTTTCGCGTGT TTTGAAAAC TTTCTGAGTCAGATTAACATTATGGAAC  
GCGTGAACGAAGGCGGCAGCCCGCTGACCATGCTGAGCCACATGATTG  
AAGCGAGCGAACGCATTGTGACGCAGATTGTGGAAGAAACCAAAGAAGA  
AAAATATGATTATCTGATTTATGATAACCATTTTCCGGTGGGCGCATTAT  
TGCGAACATTCTGCATCTGCCGAGCGTGAGCAGCTGCACCACCTTTGCG  
GTGAATCAGTATATTAAC TTTTCATGATGAACAAGAAAGCCGCCAAGTGA  
TGAAATGGATCCGCTGTATCAGAGCTGCCTGGCGGGCATGGAACGCTG  
GAACAAACAGTATGGCATGAAATGCAACAGCATGTATGATATTATGAACC  
ATCCGGGCGATATTACCATTGTGTATACGAGCAAAGAATATCAGCCGCG  
CAGCGAAGTGT TTTGATGAAAGCTATAAATTTGTGGGCCCCGAGCATTGCG  
ACCCGCAAAGAAGTGGGCAGCTTTCCGACCGAAGATCTGAAAAACGAAA  
AAGTGATTTTTATTAGCATGGGCACCGTGTTTAAACGAACAGCCGGCGCT  
GTATGAAAAATGCTTTGAAGCGTTTAAAGATGTGGATGCGACCGTGGTG  
CTGGTGGTGGGCAAAAAAATTAACATTAGTCAGTTTGA AACATTCCGAA  
AACTTTAACTGTATAACTATGTGCCGCAGCTGGAAGTGCTGCAGCATG  
CGGATGTGTTTGTGACCCATGGCGGCATGAACAGCAGTAGCGAAGCGC  
TGTATTATGGCGTGCCGCTGGTGGTGATTCCGGTGACCGGCGATCAGC  
CGTTTGTGGCGAAACGCCTGACCGAAGTGGGCGCGGGCATTCCGCCTGA  
ACCGCAACGAACTGACGAGCGAACTGCTGCGCGAAGCGGTGAAAAAAG  
TGATGGATGATGTGACCTTTAAAGAAAACAGCCGCAAAGTGGGCGAAAG  
CCTGCGCAACGCGGGCGGCTATCAGCGCGCGGTGGAAGAAATTTTAA  
ACTGAAAATGAAACCGTATGTGAAAATTAATAA

**>BarGT-3 (Protein sequence)**

MANVLVINFPGE GHINPTLAI VSELIQRGETVVS YCIEDYRKKVEATGAEFRV  
FENFLSQINIMERVNEGG SPLTMLSHMIEASERIVTQIVEETKEEKYDYLIYDN  
HFPVGRIIANILHLPSVSSCTTF AVNQYINFHDEQESRQVDEM DPLYQSCLA  
GMERW NKQYGMKCN SMYDIMNHPGDITIVYTSKEYQPRSEVFDES YK FVG  
PSIATRKEVGSFPTEDLKNEKVIFISMGTVFNEQPALYEKCFEAFKDVDATVV  
LVVGKKINISQFENIPKNFKLYNYVPQLV LQHADV FVTHGGMNSSSEALYY  
GVPLVVIPVTGDQPFVAKRLTEVGAGIRLNRNELTSELLREAVKKVMDDVTF  
KENS R KVGESLRNAGGYQRAVEE I FKLKMKPYVKIK

## 6. References

1. S. Kuraku, C. M. Zmasek, O. Nishimura and K. Katoh, aLeaves facilitates on-demand exploration of metazoan gene family trees on MAFFT sequence alignment server with enhanced interactivity, *Nucleic acids research*, 2013, **41**, W22-28.
2. K. Katoh, J. Rozewicki and K. D. Yamada, MAFFT online service: multiple sequence alignment, interactive sequence choice and visualization, *Briefings in bioinformatics*, 2017, DOI: 10.1093/bib/bbx108.
3. M. N. Price, P. S. Dehal and A. P. Arkin, FastTree: computing large minimum evolution trees with profiles instead of a distance matrix, *Molecular biology and evolution*, 2009, **26**, 1641-1650.
4. H. Shimodaira and M. Hasegawa, Multiple Comparisons of Log-Likelihoods with Applications to Phylogenetic Inference, *Mol.biol.evol*, 1999, 8.
5. I. Letunic and P. Bork, Interactive Tree Of Life (iTOL): an online tool for phylogenetic tree display and annotation, *Bioinformatics*, 2007, **23**, 127-128.
6. K. Miyazaki, in *Method Enzymol*, Elsevier, 2011, vol. 498, pp. 399-406.
7. J. Yang, A. J. Ruff, M. Arlt and U. Schwaneberg, Casting epPCR (cepPCR): A simple random mutagenesis method to generate high quality mutant libraries, *Biotechnol Bioeng*, 2017, **114**, 1921-1927.
8. J. Jumper, R. Evans, A. Pritzel, T. Green, M. Figurnov, O. Ronneberger, K. Tunyasuvunakool, R. Bates, A. Žídek, A. Potapenko, A. Bridgland, C. Meyer, S. A. A. Kohl, A. J. Ballard, A. Cowie, B. Romera-Paredes, S. Nikolov, R. Jain, J. Adler, T. Back, S. Petersen, D. Reiman, E. Clancy, M. Zielinski, M. Steinegger, M. Pacholska, T. Berghammer, S. Bodenstein, D. Silver, O. Vinyals, A. W. Senior, K. Kavukcuoglu, P. Kohli and D. Hassabis, Highly accurate protein structure prediction with AlphaFold, *Nature*, 2021, DOI: 10.1038/s41586-021-03819-2.
9. R. A. Laskowski, M. W. MacArthur, D. S. Moss and J. M. Thornton, PROCHECK: a program to check the stereochemical quality of protein structures, *J Appl Crystallogr*, 1993, **26**, 283-291.
10. H. Land and M. S. Humble, in *Protein Eng*, Springer, 2018, pp. 43-67.
11. E. Krieger, R. L. Dunbrack, R. W. Hooft and B. Krieger, in *Computational Drug Discovery and Design*, Springer, 2012, pp. 405-421.
12. J. A. Maier, C. Martinez, K. Kasavajhala, L. Wickstrom, K. E. Hauser and C. Simmerling, ff14SB: improving the accuracy of protein side chain and backbone parameters from ff99SB, *J. Chem. Theory Comput.*, 2015, **11**, 3696-3713.
13. J. Wang, R. M. Wolf, J. W. Caldwell, P. A. Kollman and D. A. Case, Development and testing of a general amber force field, *J. Comput. Chem.*, 2004, **25**, 1157-1174.
14. B. Liu, C. Zhao, Q. Xiang, N. Zhao, Y. Luo and R. Bao, Structural and biochemical studies of the glycosyltransferase Bs-YjiC from *Bacillus subtilis*, *Int J Biol Macromol*, 2020, DOI: 10.1016/j.ijbiomac.2020.10.238.
15. B. Guo, X. Hou, Y. Zhang, Z. Deng, Q. Ping, K. Fu, Z. Yuan and Y. Rao, Highly efficient production of rebaudioside D enabled by structure-guided engineering of bacterial glycosyltransferase YojK, *Frontiers in Bioengineering and Biotechnology*, 2022, **10**.
